# Supplementary material
Source: PubMed Central journal article supplement (PMC3142711)
Supplement: NIHMS300345-supplement.pdf [file NIHMS300345-supplement.pdf]

**Table S1. A complete list of 528 UP CIFH contigs with RA<sub>IF/CF</sub> >5, RA<sub>IH/CH</sub> >8, or ARN<sub>IF or IH</sub> >10**

| CIFH contig # | Original read # |    |     |     |       | RA or ARN |       | BLAST results                                                                                           |
|---------------|-----------------|----|-----|-----|-------|-----------|-------|---------------------------------------------------------------------------------------------------------|
|               | CF              | CH | IF  | IH  | Total | IF/CF     | IH/CH |                                                                                                         |
| 00081         | 1               | 63 | 12  | 70  | 146   | 6.1       | 1.3   | No hits found                                                                                           |
| 00109         | 0               | 13 | 115 | 30  | 158   | 58.6      | 2.7   | gi 110751180 ref XP_623564.2  multidrug resistance protein homolog (P-glycoprotein 49) [A. mellifera]   |
| 00131         | 11              | 41 | 137 | 61  | 250   | 6.4       | 1.8   | gi 198430641 ref XP_002123478.1  ~ hemicentin 1, Ig domains [Ciona intestinalis]                        |
| 00167         | 0               | 0  | 83  | 8   | 91    | 42.3      | 9.5   | gi 2500792 sp Q25479.1 NKCL_MANSE bumetanide-sensitive cotransporter, Na-K-CL symporter                 |
| 00196         | 1               | 54 | 11  | 37  | 103   | 5.6       | 0.8   | gi 110766311 ref XP_397365.3  ~ SUMO1/sentrin specific protease 1 [A. mellifera]                        |
| 00221         | 5               | 21 | 2   | 147 | 175   | 0.2       | 8.3   | gi 479443 pir S33901 reverse transcriptase, silkworm transposon Pao                                     |
| 00269         | 2               | 41 | 36  | 58  | 137   | 9.2       | 1.7   | gi 189238558 ref XP_966599.2  B-cell lymphoma 3-encoded protein (Bcl-3) isoform 1 [T. castaneum]        |
| 00315         | 1               | 85 | 22  | 85  | 193   | 11.2      | 1.2   | gi 91094211 ref XP_972733.1  ~ CG7029-PC [Tribolium castaneum]                                          |
| 00327         | 2               | 9  | 154 | 31  | 196   | 39.3      | 4.1   | No hits found                                                                                           |
| 00461         | 1               | 48 | 14  | 108 | 171   | 7.1       | 2.7   | gi 47217104 emb CAG02605.1  integrin β6 precursor [Tetraodon nigroviridis]                              |
| 00491         | 1               | 43 | 11  | 22  | 77    | 5.6       | 0.6   | No hits found                                                                                           |
| 00537         | 1               | 32 | 10  | 32  | 75    | 5.1       | 1.2   | gi 270009406 gb EFA05854.1  TcasGA2_TC008649 Tyr protein kinase [Tribolium castaneum]                   |
| 00575         | 3               | 0  | 259 | 5   | 267   | 44.0      | 5.9   | gi 154240658 dbj BAF74637.1  peptidoglycan recognition protein-D [Samia cynthia ricini]                 |
| 00636         | 3               | 34 | 43  | 46  | 126   | 7.3       | 1.6   | gi 51511835 gb AAU05129.1  hexokinase [Aedes aegypti]                                                   |
| 00661         | 1               | 48 | 26  | 51  | 126   | 13.3      | 1.3   | gi 189234794 ref XP_001807213.1  ~ Est1p-like protein B [Tribolium castaneum]                           |
| 00671         | 1               | 12 | 10  | 46  | 69    | 5.1       | 4.6   | gi 189235637 ref XP_967498.2  ral guanine nucleotide exchange factor [Tribolium castaneum]              |
| 00679         | 1               | 42 | 18  | 51  | 112   | 9.2       | 1.4   | gi 156541984 ref XP_001599563.1  tumor suppressor protein [Nasonia vitripennis]                         |
| 00737         | 2               | 4  | 131 | 2   | 139   | 33.4      | 0.6   | gi 198466442 ref XP_002135189.1  GA23919 [Drosophila pseudoobscura]                                     |
| 00745         | 1               | 39 | 11  | 57  | 108   | 5.6       | 1.7   | gi 124513436 ref XP_001350074.1  hypothetical protein [Plasmodium falciparum]                           |
| 00787         | 3               | 54 | 33  | 66  | 156   | 5.6       | 1.5   | No hits found                                                                                           |
| 00830         | 1               | 34 | 10  | 44  | 89    | 5.1       | 1.5   | No hits found                                                                                           |
| 00876         | 1               | 30 | 27  | 39  | 97    | 13.8      | 1.5   | gi 157130104 ref XP_001655562.1  acyl-CoA oxidase [Aedes aegypti]                                       |
| 00886         | 0               | 31 | 20  | 30  | 81    | 10.2      | 1.1   | gi 189234051 ref XP_001809969.1  similar to Na-K-Cl cotransporter [Tribolium castaneum]                 |
| 00903         | 1               | 32 | 10  | 24  | 67    | 5.1       | 0.9   | No hits found                                                                                           |
| 00907         | 1               | 31 | 11  | 17  | 60    | 5.6       | 0.7   | gi 242020758 ref XP_002430818.1  protein BAT5 [Pediculus humanus corporis]                              |
| 00912         | 0               | 10 | 22  | 73  | 105   | 11.2      | 8.7   | No hits found                                                                                           |
| 00915         | 0               | 21 | 21  | 26  | 68    | 10.7      | 1.5   | gi 91084647 ref XP_966816.1  ~ AGAP002414-PA [Tribolium castaneum]                                      |
| 00940         | 0               | 0  | 209 | 7   | 216   | 106.6     | 8.3   | gi 1352212 sp P48861.1 DDC_MANSE DOPA decarboxylase DDC                                                 |
| 01020         | 42              | 4  | 63  | 27  | 136   | 0.8       | 8.0   | gi 91082721 ref XP_972476.1  ~ eiger CG12919-PA, JNK [Tribolium castaneum]                              |
| 01044         | 9               | 70 | 163 | 105 | 347   | 9.2       | 1.8   | gi 289629214 ref NP_001166191.1  cactus [Bombyx mori]                                                   |
| 01099         | 1               | 17 | 33  | 56  | 107   | 16.8      | 3.9   | gi 156548358 ref XP_001603694.1  ~ dipeptidyl-peptidase [Nasonia vitripennis]                           |
| 01104         | 3               | 11 | 99  | 21  | 134   | 16.8      | 2.3   | gi 156548021 ref XP_001605638.1  ~ CG10960-PA [Nasonia vitripennis]                                     |
| 01134         | 1               | 26 | 17  | 24  | 68    | 8.7       | 1.1   | No hits found                                                                                           |
| 01154         | 1               | 33 | 12  | 22  | 68    | 6.1       | 0.8   | No hits found                                                                                           |
| 01167         | 1               | 17 | 12  | 22  | 52    | 6.1       | 1.5   | gi 193629622 ref XP_001949450.1  ~ gag-pol protein [Acyrtosiphon pisum]                                 |
| 01250         | 1               | 18 | 10  | 22  | 51    | 5.1       | 1.5   | gi 158286675 ref XP_308860.3  AGAP006894-PA [Anopheles gambiae]                                         |
| 01313         | 2               | 52 | 33  | 35  | 122   | 8.4       | 0.8   | gi 24200917 ref XP_002425367.1  Ser-Thr protein kinase, plant-type [P. humanus corporis]                |
| 01323         | 2               | 12 | 49  | 18  | 81    | 12.5      | 1.8   | gi 162462783 ref NP_001104822.1  carboxylesterase-6 [Bombyx mori]                                       |
| 01326         | 1               | 9  | 19  | 70  | 99    | 9.7       | 9.2   | gi 52782739 sp Q8ISB6.1 BGBP2_MANSE β-1,3-glucan recognition protein 2                                  |
| 01390         | 1               | 31 | 14  | 19  | 65    | 7.1       | 0.7   | gi 46403173 gb AA592609.1  vrille transcription factor [Antheraea pernyi]                               |
| 01407         | 1               | 8  | 24  | 13  | 46    | 12.2      | 1.9   | gi 114565510 ref XP_001150205.1  Asp-tRNA synthetase 2 (mitochondrial) isoform 6 [Pan troglodytes]      |
| 01426         | 0               | 4  | 22  | 11  | 37    | 11.2      | 3.3   | gi 242024322 ref XP_002432577.1  peptidyl-Gly α-amidating monoxygenase [P. humanus corporis]            |
| 01475         | 1               | 20 | 10  | 26  | 57    | 5.1       | 1.5   | gi 157125003 ref XP_001654205.1  AAEL001898 [Aedes aegypti]                                             |
| 01477         | 2               | 1  | 37  | 5   | 45    | 9.4       | 5.9   | gi 156555710 ref XP_001603237.1  ~ RE03018p, partial [Nasonia vitripennis]                              |
| 01504         | 1               | 44 | 15  | 31  | 91    | 7.6       | 0.8   | gi 91080069 ref XP_967249.1  HLA-B associated transcript 3 [Tribolium castaneum]                        |
| 01524         | 0               | 6  | 0   | 48  | 54    | 0.0       | 9.5   | No hits found                                                                                           |
| 01551         | 16              | 1  | 56  | 12  | 85    | 1.8       | 14.2  | gi 91079628 ref XP_967731.1  ~ AGAP002355-PA [Tribolium castaneum]                                      |
| 01622         | 1               | 35 | 23  | 19  | 78    | 11.7      | 0.6   | No hits found                                                                                           |
| 01650         | 1               | 16 | 12  | 14  | 43    | 6.1       | 1.0   | gi 110757972 ref XP_001120878.1  ~ delangin isoform A [Apis mellifera]                                  |
| 01659         | 1               | 11 | 10  | 26  | 48    | 5.1       | 2.8   | gi 91079704 ref XP_968959.1  eukaryotic peptide chain release factor GTP-binding subunit [T. castaneum] |
| 01667         | 0               | 7  | 98  | 33  | 138   | 50.0      | 5.6   | gi 26006435 gb AAL76085.1  proPO-activating proteinase-2 [Manduca sexta]                                |
| 01681         | 1               | 62 | 10  | 67  | 140   | 5.1       | 1.3   | gi 189239491 ref XP_975498.2  ~ MTA1-like CG2244-PB [Tribolium castaneum]                               |
| 01714         | 3               | 2  | 90  | 1   | 96    | 15.3      | 0.6   | No hits found                                                                                           |
| 01744         | 3               | 21 | 44  | 49  | 117   | 7.5       | 2.8   | gi 94470463 gb ABF20542.1  lipophorin receptor [Galleria mellonella]                                    |
| 01745         | 9               | 39 | 223 | 114 | 385   | 12.6      | 3.5   | gi 3859938 gb AAC72919.1  reverse transcriptase [Lymantria dispar]                                      |
| 01765         | 0               | 21 | 220 | 7   | 248   | 112.2     | 0.4   | gi 260908056 gb ACX53826.1  neutral lipase [Heliothis virescens]                                        |
| 01810         | 0               | 26 | 45  | 66  | 137   | 22.9      | 3.0   | gi 60299972 gb AAX18637.1  proPO-activating proteinase-3 [Manduca sexta]                                |
| 01819         | 0               | 0  | 43  | 4   | 47    | 21.9      | 4.7   | gi 156555781 ref XP_001603060.1  triacylglycerol lipase, pancreatic [Nasonia vitripennis]               |
| 01820         | 0               | 0  | 51  | 0   | 51    | 26.0      | 0.0   | gi 193591841 ref XP_001946694.1  ~ AGAP011571-PA [Acyrtosiphon pisum]                                   |
| 01888         | 2               | 5  | 36  | 15  | 58    | 9.2       | 3.6   | gi 134254438 ref NP_001077079.1  cytochrome P450 9a20 [Bombyx mori]                                     |
| 01895         | 0               | 0  | 110 | 3   | 113   | 56.1      | 3.6   | gi 162424467 gb ABX89951.1  Asp 1-decarboxylase [Tribolium castaneum]                                   |
| 01927         | 2               | 42 | 28  | 36  | 108   | 7.1       | 1.0   | gi 91077580 ref XP_972986.1  ~ AGAP002461-PA [Tribolium castaneum]                                      |
| 01941         | 2               | 91 | 32  | 68  | 193   | 8.2       | 0.9   | No hits found                                                                                           |
| 01970         | 1               | 16 | 12  | 29  | 58    | 6.1       | 2.2   | gi 157118595 ref XP_001659169.1  guanine nucleotide exchange factor [Aedes aegypti]                     |
| 01976         | 2               | 32 | 20  | 25  | 79    | 5.1       | 0.9   | gi 116326772 ref YP_803309.1  hypothetical protein TnAV2c gp086 [Trichoplusia ni ascovirus 2c]          |
| 01983         | 1               | 47 | 10  | 102 | 160   | 5.1       | 2.6   | No hits found                                                                                           |
| 02003         | 1               | 18 | 13  | 12  | 44    | 6.6       | 0.8   | gi 221105965 ref XP_002169026.1  ~ predicted protein [Hydra magnipapillata]                             |
| 02023         | 1               | 0  | 33  | 7   | 41    | 16.8      | 8.3   | gi 148611442 gb ABQ95973.1  tyrosine hydroxylase isoform A [Manduca sexta]                              |
| 02067         | 1               | 0  | 280 | 82  | 363   | 142.8     | 97.4  | gi 110649240 emb CAL25129.1  gloverin [Manduca sexta]                                                   |
| 02114         | 11              | 1  | 130 | 4   | 146   | 6.0       | 4.7   | gi 260908058 gb ACX53827.1  neutral lipase [Heliothis virescens]                                        |
| 02145         | 0               | 15 | 20  | 95  | 130   | 10.2      | 7.5   | gi 157134051 ref XP_001663123.1  transferrin [Aedes aegypti]                                            |
| 02147         | 1               | 0  | 47  | 0   | 48    | 24.0      | 0.0   | gi 193662234 ref XP_001948711.1  alanine aminotransferase [Acyrtosiphon pisum]                          |
| 02267         | 12              | 9  | 156 | 308 | 485   | 6.6       | 40.6  | gi 110826028 gb ABH01082.1  esterase [Sesamia nonagrioides]                                             |
| 02280         | 2               | 1  | 26  | 3   | 32    | 6.6       | 3.6   | No hits found                                                                                           |
| 02314         | 5               | 11 | 53  | 26  | 95    | 5.4       | 2.8   | gi 91078456 ref XP_976128.1  hypothetical protein [Tribolium castaneum]                                 |
| 02332         | 2               | 33 | 23  | 35  | 93    | 5.9       | 1.3   | gi 157412314 ref NP_001098698.1  adenosine deaminase-related growth factor [Bombyx mori]                |

|       |     |    |      |     |      |       |       |                                                                                                  |
|-------|-----|----|------|-----|------|-------|-------|--------------------------------------------------------------------------------------------------|
| 02361 | 7   | 4  | 70   | 1   | 82   | 5.1   | 0.3   | gi 56418425 gb AAV91020.1  hemolymph proteinase 22 [Manduca sexta]                               |
| 02370 | 1   | 19 | 12   | 5   | 37   | 6.1   | 0.3   | No hits found                                                                                    |
| 02382 | 0   | 2  | 109  | 69  | 180  | 55.6  | 41.0  | gi 4090964 gb AAD09279.1  immune-related Hdd1 [Hyphantria cunea]                                 |
| 02467 | 1   | 37 | 45   | 46  | 129  | 22.9  | 1.5   | No hits found                                                                                    |
| 02544 | 1   | 51 | 51   | 42  | 145  | 26.0  | 1.0   | gi 112983138 ref NP_001037040.1  phenol UDP-glucosyltransferase [Bombyx mori]                    |
| 02565 | 14  | 8  | 89   | 230 | 341  | 3.2   | 34.1  | gi 110826028 gb ABH01082.1  esterase [Sesamia nonagrioides]                                      |
| 02627 | 1   | 26 | 12   | 30  | 69   | 6.1   | 1.4   | gi 158287951 ref XP_309827.4  AGAP010875-PA [Anopheles gambiae]                                  |
| 02645 | 10  | 1  | 16   | 7   | 34   | 0.8   | 8.3   | gi 91088493 ref XP_975965.1  CG3625-PB isoform 2 [Tribolium castaneum]                           |
| 02647 | 1   | 32 | 12   | 12  | 57   | 6.1   | 0.4   | gi 170052222 ref XP_001862123.1  conserved hypothetical protein [Culex quinquefasciatus]         |
| 02657 | 1   | 17 | 10   | 2   | 30   | 5.1   | 0.1   | gi 270016687 gb EFA13133.1  hypothetical TcasGA2_TC010317 [Tribolium castaneum]                  |
| 02669 | 2   | 0  | 158  | 0   | 160  | 40.3  | 0.0   | No hits found                                                                                    |
| 02685 | 1   | 22 | 11   | 25  | 59   | 5.6   | 1.3   | gi 157119616 ref XP_001659451.1  hypothetical protein AaeL_AAEL008718 [Aedes aegypti]            |
| 02693 | 21  | 7  | 310  | 19  | 357  | 7.5   | 3.2   | gi 27733415 gb AAO21505.1 AF413064_1 serpin 3 [Manduca sexta]                                    |
| 02697 | 2   | 4  | 25   | 13  | 44   | 6.4   | 3.9   | gi 195447170 ref XP_002071095.1  GK25615 [Drosophila willistoni]                                 |
| 02753 | 0   | 0  | 19   | 10  | 29   | 9.7   | 11.9  | gi 91082921 ref XP_972710.1  ~ annulin [Tribolium castaneum]                                     |
| 02798 | 1   | 23 | 11   | 37  | 72   | 5.6   | 1.9   | No hits found                                                                                    |
| 02813 | 108 | 9  | 313  | 72  | 502  | 1.5   | 9.5   | gi 242351233 gb ACS92763.1  serine proteinase-like protein 1b [Manduca sexta]                    |
| 02822 | 2   | 1  | 27   | 12  | 42   | 6.9   | 14.2  | No hits found                                                                                    |
| 02823 | 1   | 4  | 15   | 10  | 30   | 7.6   | 3.0   | gi 189241478 ref XP_001807906.1  ~ munc13-4 [Tribolium castaneum]                                |
| 02859 | 1   | 3  | 14   | 3   | 21   | 7.1   | 1.2   | gi 91084931 ref XP_970864.1  ~ AGAP007103-PA [Tribolium castaneum]                               |
| 02926 | 0   | 1  | 0    | 17  | 18   | 0.0   | 20.2  | No hits found                                                                                    |
| 02971 | 1   | 12 | 10   | 10  | 33   | 5.1   | 1.0   | No hits found                                                                                    |
| 02985 | 3   | 0  | 158  | 0   | 161  | 26.9  | 0.0   | gi 56418466 gb AAV91027.1  serine proteinase-like protein 4 [Manduca sexta]                      |
| 03018 | 0   | 54 | 22   | 79  | 155  | 11.2  | 1.7   | gi 56418395 gb AAV91005.1  hemolymph proteinase 7 [Manduca sexta]                                |
| 03020 | 1   | 11 | 11   | 14  | 37   | 5.6   | 1.5   | gi 260789631 ref XP_002589849.1  hypothetical BRAFLDRAFT_61483 [Branchiostoma floridae]          |
| 03130 | 0   | 0  | 30   | 0   | 30   | 15.3  | 0.0   | No hits found                                                                                    |
| 03142 | 1   | 7  | 420  | 121 | 549  | 214.2 | 20.5  | gi 33860163 sp P82176.2 IMPI_GALME inducible metalloproteinase inhibitor IMPI $\alpha$ precursor |
| 03159 | 1   | 11 | 12   | 19  | 43   | 6.1   | 2.1   | gi 144052390 ref NP_001040473.1  insulin-related peptide binding protein [Bombyx mori]           |
| 03185 | 106 | 0  | 234  | 10  | 350  | 1.1   | 11.9  | gi 157117489 ref XP_001658792.1  3-hydroxyacyl-CoA dehydrogenase [Aedes aegypti]                 |
| 03296 | 1   | 64 | 13   | 70  | 148  | 6.6   | 1.3   | gi 144052038 ref NP_001040449.1  actin-related protein 2/3 complex subunit 4 [Bombyx mori]       |
| 03381 | 1   | 32 | 34   | 44  | 111  | 17.3  | 1.6   | No hits found                                                                                    |
| 03434 | 1   | 0  | 387  | 0   | 388  | 197.3 | 0.0   | gi 189234566 ref XP_001815977.1  Kaz1-ORFB CG1220-PE [Tribolium castaneum]                       |
| 03442 | 1   | 12 | 1468 | 40  | 1521 | 748.5 | 4.0   | gi 511297 gb AAC46916.1  hemolin [Manduca sexta]                                                 |
| 03445 | 1   | 44 | 17   | 32  | 94   | 8.7   | 0.9   | gi 94470463 gb ABF20542.1  lipophorin receptor [Galleria mellonella]                             |
| 03473 | 7   | 1  | 14   | 12  | 34   | 1.0   | 14.2  | gi 183979239 dbj BAG30781.1  similar to CG10638-PA [Papilio xuthus]                              |
| 03498 | 0   | 0  | 20   | 0   | 20   | 10.2  | 0.0   | gi 270000764 gb EEZ97211.1  hypothetical protein TcasGA2_TC004402 [Tribolium castaneum]          |
| 03580 | 1   | 13 | 14   | 16  | 44   | 7.1   | 1.5   | gi 225714652 gb ACO13172.1  RNA exonuclease 4 [Lepeophtheirus salmonis]                          |
| 03589 | 1   | 6  | 10   | 7   | 24   | 5.1   | 1.4   | gi 170050891 ref XP_001861516.1  solute carrier family 39 [Culex quinquefasciatus]               |
| 03674 | 1   | 0  | 5    | 21  | 27   | 2.5   | 24.9  | gi 110347837 gb ABG72720.1  protease inhibitor-like protein [Antheraea mylitta]                  |
| 03728 | 3   | 1  | 6    | 12  | 22   | 1.0   | 14.2  | gi 156541292 ref XP_001601487.1  glycogen debranching enzyme [Nasonia vitripennis]               |
| 03746 | 0   | 7  | 55   | 389 | 451  | 28.0  | 66.0  | gi 148298709 ref NP_001091749.1  possible antimicrobial peptide [Bombyx mori]                    |
| 03764 | 1   | 17 | 13   | 15  | 46   | 6.6   | 1.0   | No hits found                                                                                    |
| 03778 | 0   | 11 | 192  | 28  | 231  | 97.9  | 3.0   | gi 74813957 sp Q86RS3.1 DFP_MANSE immune-related Hdd1 precursor                                  |
| 03810 | 1   | 18 | 15   | 18  | 52   | 7.6   | 1.2   | gi 114051682 ref NP_001040173.1  calcium-binding protein p22 [Bombyx mori]                       |
| 03813 | 4   | 25 | 42   | 25  | 96   | 5.4   | 1.2   | gi 157113145 ref XP_001651912.1  deoxyribonuclease I [Aedes aegypti]                             |
| 03837 | 1   | 50 | 10   | 27  | 88   | 5.1   | 0.6   | gi 110750637 ref XP_001122480.1  ~ testis specific gene A2 [Apis mellifera]                      |
| 03989 | 0   | 1  | 8    | 24  | 33   | 4.1   | 28.5  | gi 56418399 gb AAV91007.1  hemolymph proteinase 9 [Manduca sexta]                                |
| 04085 | 0   | 34 | 3    | 268 | 305  | 1.5   | 9.4   | gi 206725499 ref NP_001128673.1  cathepsin L like protein [Bombyx mori]                          |
| 04102 | 2   | 5  | 30   | 11  | 48   | 7.6   | 2.6   | gi 91084741 ref XP_971031.1  ~ apolipoprotein D [Tribolium castaneum]                            |
| 04175 | 0   | 7  | 40   | 45  | 92   | 20.4  | 7.6   | gi 114052803 ref NP_001040277.1  salivary Cys-rich peptide [Bombyx mori]                         |
| 04187 | 1   | 8  | 13   | 19  | 41   | 6.6   | 2.8   | gi 158288876 ref XP_565967.2  AGAP000402-PA [Anopheles gambiae]                                  |
| 04202 | 2   | 2  | 0    | 18  | 22   | 0.0   | 10.7  | gi 189235866 ref XP_969616.2  splicing factor ATP-dependent RNA helicase PRP16 [T. castaneum]    |
| 04275 | 1   | 1  | 4    | 7   | 13   | 2.0   | 8.3   | No hits found                                                                                    |
| 04308 | 0   | 1  | 0    | 15  | 16   | 0.0   | 17.8  | gi 115623975 ref XP_783120.2  endonuclease-reverse transcriptase [Strongylocentrotus purpuratus] |
| 04378 | 4   | 0  | 62   | 1   | 67   | 7.9   | 1.2   | No hits found                                                                                    |
| 04432 | 24  | 97 | 291  | 206 | 618  | 6.2   | 2.5   | gi 195048783 ref XP_001992595.1  GH24838 [Drosophila grimshawi]                                  |
| 04465 | 0   | 3  | 2    | 27  | 32   | 1.0   | 10.7  | gi 168823411 ref NP_001108339.1  carboxylesterase CarE-7 [Bombyx mori]                           |
| 04491 | 0   | 1  | 2    | 13  | 16   | 1.0   | 15.4  | No hits found                                                                                    |
| 04517 | 2   | 2  | 2    | 33  | 39   | 0.5   | 19.6  | No hits found                                                                                    |
| 04518 | 1   | 11 | 57   | 2   | 71   | 29.1  | 0.2   | No hits found                                                                                    |
| 04581 | 1   | 9  | 197  | 77  | 284  | 100.4 | 10.2  | gi 13359096 dbj BAB33297.1  esterase-like protein (ESR-LP) [Bombyx mori]                         |
| 04661 | 1   | 25 | 10   | 55  | 91   | 5.1   | 2.6   | gi 91082167 ref XP_970790.1  Arp2/3 complex subunit ARPC5 [Tribolium castaneum]                  |
| 04690 | 1   | 1  | 2    | 12  | 16   | 1.0   | 14.2  | No hits found                                                                                    |
| 04720 | 26  | 1  | 1025 | 0   | 1052 | 20.1  | 0.0   | No hits found                                                                                    |
| 04736 | 2   | 17 | 22   | 27  | 68   | 5.6   | 1.9   | gi 91083777 ref XP_972333.1  tetratricopeptide repeat protein [Tribolium castaneum]              |
| 04746 | 0   | 0  | 7    | 608 | 615  | 3.6   | 721.9 | gi 195486646 ref XP_002091593.1  GE13745 [Drosophila yakuba]                                     |
| 04775 | 1   | 0  | 89   | 0   | 90   | 45.4  | 0.0   | gi 237869126 gb AAF91316.3 AF242202_1 immunectin-2 [Manduca sexta]                               |
| 04802 | 2   | 42 | 25   | 66  | 135  | 6.4   | 1.9   | gi 157412326 ref NP_001098704.1  Relish2 [Bombyx mori]                                           |
| 04808 | 0   | 0  | 426  | 2   | 428  | 217.2 | 2.4   | gi 237861314 gb AAV41237.2  immunectin-4 [Manduca sexta]                                         |
| 04830 | 12  | 0  | 124  | 0   | 136  | 5.3   | 0.0   | gi 169646838 ref NP_001112375.1  heat shock protein 25.4 [Bombyx mori]                           |
| 04862 | 3   | 15 | 39   | 21  | 78   | 6.6   | 1.7   | gi 91089817 ref XP_969063.1  ~ AGAP011081-PA [Tribolium castaneum]                               |
| 04887 | 10  | 0  | 109  | 0   | 119  | 5.6   | 0.0   | gi 169646838 ref NP_001112375.1  heat shock protein 25.4 [Bombyx mori]                           |
| 04903 | 0   | 0  | 279  | 6   | 285  | 142.3 | 7.1   | gi 187281722 ref NP_001119732.1  lebecin 3 precursor [Bombyx mori]                               |
| 04906 | 0   | 2  | 7    | 14  | 23   | 3.6   | 8.3   | gi 91081707 ref XP_971145.1  ~ AGAP004271-PA [Tribolium castaneum]                               |
| 04987 | 0   | 2  | 1    | 15  | 18   | 0.5   | 8.9   | gi 91094617 ref XP_968941.1  conserved hypothetical protein [Tribolium castaneum]                |
| 05013 | 1   | 43 | 10   | 30  | 84   | 5.1   | 0.8   | gi 158292843 ref XP_001688534.1  AGAP005245-PK [Anopheles gambiae]                               |
| 05033 | 0   | 1  | 8    | 8   | 17   | 4.1   | 9.5   | gi 260781593 ref XP_002585890.1  hypothetical BRAFLDRAFT_146067 [Branchiostoma floridae]         |
| 05084 | 0   | 1  | 1    | 9   | 11   | 0.5   | 10.7  | No hits found                                                                                    |
| 05128 | 1   | 0  | 3    | 15  | 19   | 1.5   | 17.8  | gi 194760436 ref XP_001962447.1  GF14439 [Drosophila ananassae]                                  |
| 05186 | 0   | 0  | 8    | 13  | 21   | 4.1   | 15.4  | gi 56418413 gb AAV91014.1  hemolymph proteinase 17 [Manduca sexta]                               |
| 05197 | 0   | 0  | 20   | 1   | 21   | 10.2  | 1.2   | gi 115392217 gb ABI96910.1  brasiliensin precursor, thrombin inhibitor [Triatoma brasiliensis]   |

|       |     |     |      |      |      |       |       |                                                                                                       |
|-------|-----|-----|------|------|------|-------|-------|-------------------------------------------------------------------------------------------------------|
| 05227 | 1   | 3   | 8    | 23   | 35   | 4.1   | 9.1   | gii190702438 gb ACE75327.1  conserved hypothetical protein [Glyptapanteles indiensis]                 |
| 05263 | 0   | 1   | 0    | 20   | 21   | 0.0   | 23.7  | gii91082057 ref XP_971798.1  ~AGAP004266-PA [Tribolium castaneum]                                     |
| 05306 | 1   | 8   | 11   | 10   | 30   | 5.6   | 1.5   | gii195375116 ref XP_002046349.1  GJ12849 [Drosophila virilis]                                         |
| 05371 | 0   | 1   | 3    | 11   | 15   | 1.5   | 13.1  | gii195335402 ref XP_002034354.1  GM21825 [Drosophila sechellia]                                       |
| 05439 | 0   | 6   | 232  | 22   | 260  | 118.3 | 4.4   | gii125624990 ref YP_001033473.1  hypothetical limg_2223 [Lactococcus lactis]                          |
| 05498 | 1   | 68  | 10   | 59   | 138  | 5.1   | 1.0   | gii112983834 ref NP_001037293.1  lark [Bombyx mori]                                                   |
| 05532 | 0   | 0   | 110  | 0    | 110  | 56.1  | 0.0   | No hits found                                                                                         |
| 05577 | 4   | 157 | 22   | 1895 | 2078 | 2.8   | 14.3  | gii254746342 emb CAX16636.1  putative C1A Cys protease precursor [Manduca sexta]                      |
| 05606 | 1   | 0   | 19   | 4    | 24   | 9.7   | 4.7   | gii4090968 gb AAD09281.1  immune-related Hdd13 [Hyphantria cunea]                                     |
| 05614 | 1   | 2   | 14   | 4    | 21   | 7.1   | 2.4   | gii91082437 ref XP_970911.1  ~tribbles homolog 2 [Tribolium castaneum]                                |
| 05615 | 1   | 18  | 11   | 17   | 47   | 5.6   | 1.1   | gii66560996 ref XP_624918.1  ~CG9099-PA [Apis mellifera]                                              |
| 05664 | 1   | 29  | 18   | 31   | 79   | 9.2   | 1.3   | gii94469280 gb ABF18489.1  hypothetical conserved protein [Aedes aegypti]                             |
| 05704 | 0   | 34  | 219  | 65   | 318  | 111.7 | 2.3   | gii45553223 ref NP_996139.1  CG33290 [Drosophila melanogaster]                                        |
| 05717 | 37  | 2   | 522  | 6    | 567  | 7.2   | 3.6   | gii169646838 ref NP_001112375.1  heat shock protein 25.4 [Bombyx mori]                                |
| 05753 | 2   | 0   | 6    | 15   | 23   | 1.5   | 17.8  | No hits found                                                                                         |
| 05831 | 3   | 8   | 97   | 25   | 133  | 16.5  | 3.7   | gii45594232 gb AAS68507.1  serpin-5A [Manduca sexta]                                                  |
| 05836 | 2   | 1   | 0    | 7    | 10   | 0.0   | 8.3   | gii189235110 ref XP_971078.2  receptor tyrosinephosphatase type r2a [Tribolium castaneum]             |
| 05909 | 0   | 1   | 0    | 11   | 12   | 0.0   | 13.1  | gii195048466 ref XP_001992532.1  GH24802 [Drosophila grimshawi]                                       |
| 05931 | 1   | 0   | 1    | 17   | 19   | 0.5   | 20.2  | gii66549567 ref XP_623543.1  ~CG6398-PA [Apis mellifera]                                              |
| 05936 | 1   | 13  | 16   | 13   | 43   | 8.2   | 1.2   | No hits found                                                                                         |
| 06044 | 1   | 1   | 0    | 13   | 15   | 0.0   | 15.4  | gii110756628 ref XP_396622.3  ~CG15831-PA.3 [Apis mellifera]                                          |
| 06049 | 1   | 43  | 11   | 108  | 163  | 5.6   | 3.0   | gii112983456 ref NP_001036888.1  $\beta$ -tubulin [Bombyx mori]                                       |
| 06092 | 0   | 2   | 1    | 14   | 17   | 0.5   | 8.3   | gii158297301 ref XP_317561.4  AGAP007920-PA [Anopheles gambiae]                                       |
| 06149 | 21  | 22  | 686  | 32   | 761  | 16.7  | 1.7   | gii27733421 gb AAO21508.1 AF413067_1 serine protease-like protein [Manduca sexta]                     |
| 06195 | 0   | 1   | 2    | 9    | 12   | 1.0   | 10.7  | No hits found                                                                                         |
| 06196 | 0   | 1   | 2    | 9    | 12   | 1.0   | 10.7  | gii222160397 gb ACM47363.1  SID-1-related protein 1 [Spodoptera exigua]                               |
| 06215 | 29  | 1   | 108  | 8    | 146  | 1.9   | 9.5   | gii112983872 ref NP_001036857.1  serpin-like protein (SEP-LP) or serpin-12 [Bombyx mori]              |
| 06260 | 1   | 15  | 10   | 20   | 46   | 5.1   | 1.6   | gii114050773 ref NP_001040155.1  short-chain dehydrogenase/reductase-like [Bombyx mori]               |
| 06304 | 1   | 0   | 11   | 1    | 13   | 5.6   | 1.2   | gii170038257 ref XP_001846968.1  dipeptidyl peptidase 4, apoptosis, immunity [Culex quinquefasciatus] |
| 06399 | 0   | 1   | 3    | 7    | 11   | 1.5   | 8.3   | No hits found                                                                                         |
| 06512 | 0   | 1   | 2    | 7    | 10   | 1.0   | 8.3   | No hits found                                                                                         |
| 06554 | 0   | 1   | 1    | 9    | 11   | 0.5   | 10.7  | gii110762260 ref XP_001122479.1  partitioning-defective 3-like protein [Apis mellifera]               |
| 06581 | 0   | 0   | 13   | 10   | 23   | 6.6   | 11.9  | gii4090970 gb AAD09282.1  immune-related Hdd23 [Hyphantria cunea]                                     |
| 06604 | 9   | 2   | 113  | 9    | 133  | 6.4   | 5.3   | No hits found                                                                                         |
| 06630 | 2   | 40  | 44   | 77   | 163  | 11.2  | 2.3   | gii55139125 gb AAV41236.1  immunectin-3 [Manduca sexta]                                               |
| 06639 | 5   | 1   | 1    | 10   | 17   | 0.1   | 11.9  | No hits found                                                                                         |
| 06782 | 0   | 0   | 102  | 17   | 119  | 52.0  | 20.2  | gii67906420 gb AAV82587.1  attacin-1 [Manduca sexta]                                                  |
| 06814 | 1   | 24  | 10   | 34   | 69   | 5.1   | 1.7   | gii156543959 ref XP_001603239.1  hypothetical protein [Nasonia vitripennis]                           |
| 06833 | 0   | 1   | 0    | 10   | 11   | 0.0   | 11.9  | No hits found                                                                                         |
| 06836 | 1   | 0   | 10   | 0    | 11   | 5.1   | 0.0   | No hits found                                                                                         |
| 06858 | 0   | 1   | 2    | 8    | 11   | 1.0   | 9.5   | gii110766283 ref XP_395375.3  ~Suv4-20 CG13363-PA isoforms 1 [Apis mellifera]                         |
| 06868 | 0   | 1   | 1    | 11   | 13   | 0.5   | 13.1  | gii193713771 ref XP_001946690.1  ankyrin repeat domain 54 [Acyrtosiphon pisum]                        |
| 06870 | 0   | 1   | 3    | 7    | 11   | 1.5   | 8.3   | No hits found                                                                                         |
| 06873 | 6   | 0   | 59   | 0    | 65   | 5.0   | 0.0   | No hits found                                                                                         |
| 06893 | 0   | 1   | 1    | 20   | 22   | 0.5   | 23.7  | gii126635756 gb ABO21763.1  Toll receptor [Manduca sexta]                                             |
| 06945 | 0   | 0   | 0    | 9    | 9    | 0.0   | 10.7  | No hits found                                                                                         |
| 06987 | 0   | 0   | 74   | 0    | 74   | 37.7  | 0.0   | No hits found                                                                                         |
| 07026 | 0   | 1   | 2    | 7    | 10   | 1.0   | 8.3   | No hits found                                                                                         |
| 07059 | 0   | 1   | 0    | 11   | 12   | 0.0   | 13.1  | No hits found                                                                                         |
| 07116 | 1   | 4   | 902  | 3    | 910  | 459.9 | 0.9   | gii171262319 gb ACB45566.1  lebecin-like protein [Antheraea pernyi]                                   |
| 07134 | 1   | 1   | 1    | 12   | 15   | 0.5   | 14.2  | gii190341030 ref NP_001121786.1  carboxylesterase CarE-14 [Bombyx mori]                               |
| 07157 | 2   | 1   | 0    | 7    | 10   | 0.0   | 8.3   | gii158284747 ref XP_307835.4  AGAP009424-PA [Anopheles gambiae]                                       |
| 07163 | 0   | 0   | 4    | 11   | 15   | 2.0   | 13.1  | gii190341030 ref NP_001121786.1  carboxylesterase CarE-14 [Bombyx mori]                               |
| 07176 | 0   | 0   | 1    | 13   | 14   | 0.5   | 15.4  | gii115620372 ref XP_001200099.1  endonuclease-reverse transcriptase [Strongylocentrotus purpuratus]   |
| 07196 | 0   | 1   | 0    | 8    | 9    | 0.0   | 9.5   | No hits found                                                                                         |
| 07203 | 2   | 3   | 312  | 22   | 339  | 79.5  | 8.7   | gii67906420 gb AAV82587.1  attacin-1 [Manduca sexta]                                                  |
| 07293 | 1   | 0   | 11   | 0    | 12   | 5.6   | 0.0   | gii21552589 gb AAM54724.1  cytochrome P450 monooxygenase CYP321A1 [Helicoverpa zea]                   |
| 07305 | 1   | 24  | 13   | 11   | 49   | 6.6   | 0.5   | gii91085959 ref XP_971351.1  lethal (1) G0004 CG11738-PA [Tribolium castaneum]                        |
| 07395 | 2   | 4   | 26   | 2    | 34   | 6.6   | 0.6   | No hits found                                                                                         |
| 07417 | 2   | 0   | 1    | 11   | 14   | 0.3   | 13.1  | gii195154531 ref XP_002018175.1  GL16908 [Drosophila persimilis]                                      |
| 07494 | 0   | 1   | 1    | 10   | 12   | 0.5   | 11.9  | No hits found                                                                                         |
| 07536 | 7   | 0   | 383  | 2    | 392  | 27.9  | 2.4   | No hits found                                                                                         |
| 07553 | 0   | 4   | 18   | 33   | 55   | 9.2   | 9.8   | No hits found                                                                                         |
| 07561 | 0   | 1   | 0    | 15   | 16   | 0.0   | 17.8  | No hits found                                                                                         |
| 07611 | 1   | 6   | 10   | 15   | 32   | 5.1   | 3.0   | gii157105718 ref XP_001648995.1  hypothetical protein AaeL_AAEL004355 [Aedes aegypti]                 |
| 07635 | 0   | 1   | 0    | 8    | 9    | 0.0   | 9.5   | No hits found                                                                                         |
| 07639 | 651 | 0   | 1237 | 14   | 1902 | 1.0   | 16.6  | gii134436 sp P14754.1 SERA_MANSE serpin-1                                                             |
| 07722 | 1   | 0   | 10   | 0    | 11   | 5.1   | 0.0   | gii156546046 ref XP_001600313.1  ~GH22922p [Nasonia vitripennis]                                      |
| 07809 | 0   | 1   | 0    | 15   | 16   | 0.0   | 17.8  | No hits found                                                                                         |
| 07883 | 0   | 0   | 3    | 792  | 795  | 1.5   | 940.4 | gii157128533 ref XP_001661472.1  hypothetical protein AaeL_AAEL011180 [Aedes aegypti]                 |
| 07895 | 0   | 1   | 0    | 9    | 10   | 0.0   | 10.7  | gii91089189 ref XP_974407.1  $\gamma$ -Glu transpeptidase [Tribolium castaneum]                       |
| 07958 | 2   | 1   | 6    | 8    | 17   | 1.5   | 9.5   | gii156545127 ref XP_001602358.1  conserved hypothetical protein [Nasonia vitripennis]                 |
| 07975 | 121 | 1   | 1930 | 0    | 2052 | 8.1   | 0.0   | gii159526 gb AAA29320.1  Met-rich storage protein 1 [Manduca sexta]                                   |
| 08035 | 1   | 16  | 10   | 82   | 109  | 5.1   | 6.1   | No hits found                                                                                         |
| 08067 | 1   | 0   | 18   | 0    | 19   | 9.2   | 0.0   | gii197209932 ref NP_001127730.1  uridine diphosphate glucosyltransferase [Bombyx mori]                |
| 08081 | 1   | 0   | 27   | 0    | 28   | 13.8  | 0.0   | No hits found                                                                                         |
| 08105 | 0   | 1   | 0    | 7    | 8    | 0.0   | 8.3   | gii157110092 ref XP_001650948.1  hairy protein [Aedes aegypti]                                        |
| 08141 | 84  | 0   | 845  | 0    | 929  | 5.1   | 0.0   | gii159526 gb AAA29320.1  Met-rich storage protein 1 [Manduca sexta]                                   |
| 08231 | 0   | 1   | 0    | 34   | 35   | 0.0   | 40.4  | gii56418417 gb AAV91016.1  hemolymph proteinase 18 [Manduca sexta]                                    |
| 08247 | 27  | 2   | 122  | 18   | 169  | 2.3   | 10.7  | gii208972535 gb ACI32828.1  $\beta$ -1,3-glucan recognition protein 3 [Helicoverpa armigera]          |
| 08286 | 0   | 0   | 139  | 23   | 162  | 70.9  | 27.3  | gii56462340 gb AAV91453.1  protease inhibitor 6 [Lonomia obliqua]                                     |

|       |     |     |      |     |      |       |       |                                 |                                                               |
|-------|-----|-----|------|-----|------|-------|-------|---------------------------------|---------------------------------------------------------------|
| 08332 | 0   | 0   | 1    | 15  | 16   | 0.5   | 17.8  | gij170062231 ref XP_001866577.1 | γ-Glu transpeptidase [Culex quinquefasciatus]                 |
| 08371 | 0   | 0   | 79   | 0   | 79   | 40.3  | 0.0   | No hits found                   |                                                               |
| 08421 | 4   | 2   | 28   | 99  | 133  | 3.6   | 58.8  | gij7327646 gb AAB31190.2        | lysozyme [Manduca sexta]                                      |
| 08467 | 0   | 0   | 113  | 0   | 113  | 57.6  | 0.0   | gij112983866 ref NP_001036858.1 | Bacteriophage T7 lysozyme-like protein 1 [Bombyx mori]        |
| 08469 | 2   | 1   | 0    | 8   | 11   | 0.0   | 9.5   | No hits found                   |                                                               |
| 08484 | 1   | 1   | 0    | 8   | 10   | 0.0   | 9.5   | No hits found                   |                                                               |
| 08496 | 1   | 10  | 13   | 4   | 28   | 6.6   | 0.5   | No hits found                   |                                                               |
| 08561 | 0   | 0   | 3    | 353 | 356  | 1.5   | 419.1 | No hits found                   |                                                               |
| 08586 | 2   | 118 | 27   | 72  | 219  | 6.9   | 0.7   | gij2627133 dbj BAA23488.1       | polyubiquitin [Cricetulus griseus]                            |
| 08596 | 0   | 1   | 0    | 7   | 8    | 0.0   | 8.3   | gij147905832 ref NP_001086660.1 | MGC80032 protein [Xenopus laevis]                             |
| 08608 | 1   | 3   | 11   | 3   | 18   | 5.6   | 1.2   | gij91087269 ref XP_975538.1     | acyl-CoA synthetase family member 3 [Tribolium castaneum]     |
| 08679 | 2   | 1   | 1    | 8   | 12   | 0.3   | 9.5   | No hits found                   |                                                               |
| 08696 | 1   | 1   | 8    | 14  | 24   | 4.1   | 16.6  | gij56554907 gb AAV98008.1       | hypothetical protein ORF3004 [Cotesia plutellae polydnavirus] |
| 08751 | 1   | 0   | 72   | 0   | 73   | 36.7  | 0.0   | No hits found                   |                                                               |
| 08846 | 1   | 0   | 27   | 0   | 28   | 13.8  | 0.0   | No hits found                   |                                                               |
| 08854 | 220 | 3   | 3742 | 0   | 3965 | 8.7   | 0.0   | gij5869985 emb CAB55603.1       | moderately Met-rich storage protein[Spodoptera litura]        |
| 08902 | 0   | 0   | 164  | 14  | 178  | 83.6  | 16.6  | gij67906420 gb AAV82587.1       | attacin-1 [Manduca sexta]                                     |
| 09035 | 0   | 1   | 2    | 723 | 726  | 1.0   | 858.5 | No hits found                   |                                                               |
| 09052 | 0   | 18  | 23   | 8   | 49   | 11.7  | 0.5   | gij229002332 dbj BAH57948.1     | hypothetical protein [Bombyx mori]                            |
| 09055 | 1   | 1   | 0    | 7   | 9    | 0.0   | 8.3   | No hits found                   |                                                               |
| 09073 | 1   | 30  | 15   | 31  | 77   | 7.6   | 1.2   | No hits found                   |                                                               |
| 09097 | 0   | 1   | 0    | 11  | 12   | 0.0   | 13.1  | gij91083067 ref XP_967512.1     | ~ α(1,3) fucosyltransferase [Tribolium castaneum]             |
| 09112 | 0   | 1   | 0    | 8   | 9    | 0.0   | 9.5   | gij156547305 ref XP_001601599.1 | ~ ENSANGP00000016048 [Nasonia vitripennis]                    |
| 09113 | 0   | 0   | 0    | 13  | 13   | 0.0   | 15.4  | gij193636468 ref XP_001945548.1 | CRAL/TRIO domain-containing protein [Acyrthosiphon pisum]     |
| 09137 | 0   | 0   | 1    | 12  | 13   | 0.5   | 14.2  | No hits found                   |                                                               |
| 09170 | 0   | 0   | 55   | 0   | 55   | 28.0  | 0.0   | gij158299588 ref XP_319685.4    | AGAP008931-PA [Anopheles gambiae]                             |
| 09204 | 2   | 1   | 0    | 8   | 11   | 0.0   | 9.5   | gij195026159 ref XP_001986195.1 | GH20660 [Drosophila grimshawi]                                |
| 09221 | 1   | 1   | 0    | 8   | 10   | 0.0   | 9.5   | gij115673122 ref XP_792128.2    | hypothetical protein [Strongylocentrotus purpuratus]          |
| 09242 | 1   | 1   | 0    | 13  | 15   | 0.0   | 15.4  | No hits found                   |                                                               |
| 09278 | 0   | 1   | 1    | 7   | 9    | 0.5   | 8.3   | No hits found                   |                                                               |
| 09303 | 0   | 2   | 2    | 34  | 38   | 1.0   | 20.2  | gij195431445 ref XP_002063752.1 | GK15838 [Drosophila willistonii]                              |
| 09484 | 1   | 0   | 134  | 56  | 191  | 68.3  | 66.5  | gij29469961 gb AAO74637.1       | antimicrobial peptide moricin [Manduca sexta]                 |
| 09513 | 0   | 1   | 1    | 8   | 10   | 0.5   | 9.5   | No hits found                   |                                                               |
| 09529 | 0   | 1   | 3    | 7   | 11   | 1.5   | 8.3   | No hits found                   |                                                               |
| 09545 | 1   | 8   | 15   | 3   | 27   | 7.6   | 0.4   | No hits found                   |                                                               |
| 09549 | 0   | 1   | 0    | 9   | 10   | 0.0   | 10.7  | gij195473285 ref XP_002088926.1 | GE18840 [Drosophila yakuba]                                   |
| 09554 | 2   | 0   | 24   | 0   | 26   | 6.1   | 0.0   | No hits found                   |                                                               |
| 09608 | 1   | 7   | 25   | 20  | 53   | 12.7  | 3.4   | gij91078456 ref XP_976128.1     | hypothetical protein [Tribolium castaneum]                    |
| 09721 | 1   | 5   | 11   | 2   | 19   | 5.6   | 0.5   | gij66517077 ref XP_393677.2     | downstream of son gene/protein homolog [Apis mellifera]       |
| 09729 | 0   | 1   | 2    | 7   | 10   | 1.0   | 8.3   | gij115894520 ref XP_795273.2    | ~ GPI7 [Strongylocentrotus purpuratus]                        |
| 09768 | 0   | 1   | 0    | 7   | 8    | 0.0   | 8.3   | gij153791703 ref NP_001093297.1 | 3-hydroxy-3-methylglutaryl-CoA synthase [Bombyx mori]         |
| 09830 | 1   | 7   | 18   | 0   | 26   | 9.2   | 0.0   | No hits found                   |                                                               |
| 09876 | 0   | 1   | 0    | 11  | 12   | 0.0   | 13.1  | gij110777805 ref XP_001122792.1 | ~ CG11438-PA, partial [Apis mellifera]                        |
| 09887 | 2   | 0   | 26   | 0   | 28   | 6.6   | 0.0   | gij70905472 gb AAZ14793.1       | 33.6 kDa small heat shock protein [Choristoneura fumiferana]  |
| 10026 | 0   | 1   | 0    | 7   | 8    | 0.0   | 8.3   | No hits found                   |                                                               |
| 10071 | 11  | 1   | 1117 | 0   | 1129 | 51.8  | 0.0   | gij228382 prf 1803340A          | Met-rich storage protein SP1A                                 |
| 10234 | 0   | 1   | 249  | 7   | 257  | 127.0 | 8.3   | gij169264911 dbj BAG12297.1     | gallerimycin [Samia cynthia ricini]                           |
| 10297 | 18  | 8   | 311  | 125 | 462  | 8.8   | 18.6  | No hits found                   |                                                               |
| 10409 | 1   | 1   | 0    | 7   | 9    | 0.0   | 8.3   | gij110758847 ref XP_001121639.1 | ATP-dependent RNA helicase kurz [Apis mellifera]              |
| 10485 | 4   | 0   | 2    | 11  | 17   | 0.3   | 13.1  | No hits found                   |                                                               |
| 10649 | 1   | 80  | 12   | 63  | 156  | 6.1   | 0.9   | No hits found                   |                                                               |
| 10705 | 1   | 1   | 3    | 8   | 13   | 1.5   | 9.5   | gij91094369 ref XP_970631.1     | ~ CG14435-PA [Tribolium castaneum]                            |
| 10722 | 9   | 3   | 102  | 3   | 117  | 5.8   | 1.2   | gij110347833 gb ABG72718.1      | protease inhibitor-like protein [Antheraea mylitta]           |
| 10753 | 1   | 0   | 6    | 12  | 19   | 3.1   | 14.2  | No hits found                   |                                                               |
| 10763 | 0   | 2   | 0    | 20  | 22   | 0.0   | 11.9  | No hits found                   |                                                               |
| 10772 | 1   | 6   | 14   | 5   | 26   | 7.1   | 1.0   | No hits found                   |                                                               |
| 10791 | 1   | 0   | 1081 | 1   | 1083 | 551.2 | 1.2   | gij4262357 gb AAD14591.1        | scolexin A [Manduca sexta]                                    |
| 10792 | 0   | 0   | 333  | 0   | 333  | 169.8 | 0.0   | gij4262357 gb AAD14591.1        | scolexin A [Manduca sexta]                                    |
| 10822 | 0   | 1   | 0    | 14  | 15   | 0.0   | 16.6  | No hits found                   |                                                               |
| 10853 | 0   | 0   | 113  | 1   | 114  | 57.6  | 1.2   | gij171262319 gb ACB45566.1      | lebobcin-like protein [Antheraea pernyi]                      |
| 10913 | 0   | 1   | 0    | 9   | 10   | 0.0   | 10.7  | gij91087219 ref XP_975481.1     | ~ pinn [Tribolium castaneum]                                  |
| 10927 | 0   | 1   | 1    | 9   | 11   | 0.5   | 10.7  | gij195394852 ref XP_002056053.1 | GJ10726 [Drosophila virilis]                                  |
| 10935 | 1   | 0   | 15   | 0   | 16   | 7.6   | 0.0   | gij56462320 gb AAV91443.1       | putative secreted peptide 30 [Lonomia obliqua]                |
| 10960 | 0   | 1   | 0    | 7   | 8    | 0.0   | 8.3   | gij189235767 ref XP_969767.2    | conserved hypothetical protein [Tribolium castaneum]          |
| 11001 | 0   | 1   | 0    | 7   | 8    | 0.0   | 8.3   | No hits found                   |                                                               |
| 11027 | 59  | 0   | 694  | 0   | 753  | 6.0   | 0.0   | gij136206 sp P22297.1           | TRF_MANSE transferrin precursor                               |
| 11040 | 0   | 4   | 51   | 249 | 304  | 26.0  | 73.9  | gij29469969 gb AAO74640.1       | antimicrobial protein attacin 2 [Manduca sexta]               |
| 11082 | 0   | 14  | 26   | 123 | 163  | 13.3  | 10.4  | No hits found                   |                                                               |
| 11164 | 1   | 1   | 0    | 8   | 10   | 0.0   | 9.5   | gij66525345 ref XP_396922.2     | ~ CG7460-PB isoform 1 [Apis mellifera]                        |
| 11195 | 0   | 0   | 2    | 16  | 18   | 1.0   | 19.0  | gij156543854 ref XP_001606812.1 | ~ CG33715-PB [Nasonia vitripennis]                            |
| 11218 | 5   | 2   | 51   | 7   | 65   | 5.2   | 4.2   | No hits found                   |                                                               |
| 11230 | 0   | 1   | 13   | 9   | 23   | 6.6   | 10.7  | gij241659425 emb CAZ65619.1     | cytochrome P450 [Cnaphalocrocis medinalis]                    |
| 11236 | 2   | 2   | 45   | 8   | 57   | 11.5  | 4.7   | No hits found                   |                                                               |
| 11311 | 0   | 1   | 3    | 9   | 13   | 1.5   | 10.7  | gij189237512 ref XP_972880.2    | protein phosphatase type 2c [Tribolium castaneum]             |
| 11329 | 0   | 1   | 1    | 7   | 9    | 0.5   | 8.3   | No hits found                   |                                                               |
| 11356 | 0   | 1   | 4    | 7   | 12   | 2.0   | 8.3   | gij156551808 ref XP_001603899.1 | arf6 guanine nucleotideexchange factor [Nasonia vitripennis]  |
| 11406 | 0   | 0   | 24   | 0   | 24   | 12.2  | 0.0   | No hits found                   |                                                               |
| 11436 | 2   | 21  | 30   | 36  | 89   | 7.6   | 2.0   | gij156308441 ref XP_001617664.1 | hypothetical NEMVEDRAFT_v1g69851[N. vectensis]                |
| 11458 | 0   | 0   | 55   | 0   | 55   | 28.0  | 0.0   | gij148298818 ref NP_001091784.1 | multi-binding protein [Bombyx mori]                           |
| 11463 | 2   | 3   | 90   | 14  | 109  | 22.9  | 5.5   | gij24416622 dbj BAC22502.1      | putative pheromone-degrading enzyme [Antheraea polyphemus]    |
| 11468 | 0   | 1   | 0    | 9   | 10   | 0.0   | 10.7  | No hits found                   |                                                               |

|       |     |    |      |      |      |       |        |                                                                                                          |
|-------|-----|----|------|------|------|-------|--------|----------------------------------------------------------------------------------------------------------|
| 11711 | 0   | 7  | 85   | 1317 | 1409 | 43.3  | 223.4  | gij29469969 gb AAO74640.1  antimicrobial protein attacin 2 [Manduca sexta]                               |
| 11845 | 0   | 2  | 9    | 17   | 28   | 4.6   | 10.1   | gij18202160 sp O76537.1 PGRP_TRINI, peptidoglycan recognition protein                                    |
| 11907 | 0   | 1  | 25   | 5    | 31   | 12.7  | 5.9    | No hits found                                                                                            |
| 11949 | 0   | 7  | 185  | 60   | 252  | 94.3  | 10.2   | gij3108071 gb AAC15762.1  putative JHE-related protein [Manduca sexta]                                   |
| 11993 | 0   | 0  | 53   | 0    | 53   | 27.0  | 0.0    | gij68144076 gb AAY86076.1  diapause bioclock protein [Bombyx mori]                                       |
| 12005 | 154 | 0  | 2177 | 0    | 2331 | 7.2   | 0.0    | gij2625150 gb AAB86646.1  moderately Met-rich hexamerin precursor [Hyalophora cecropia]                  |
| 12137 | 1   | 0  | 12   | 0    | 13   | 6.1   | 0.0    | No hits found                                                                                            |
| 12142 | 0   | 0  | 1    | 9    | 10   | 0.5   | 10.7   | gij158301123 ref XP_320871.3  AGAP011635-PA [Anopheles gambiae]                                          |
| 12151 | 0   | 0  | 153  | 0    | 153  | 78.0  | 0.0    | gij116084 sp P14665.1 CEC5_MANSE bactericidin B-5P, cecropin-like                                        |
| 12190 | 0   | 1  | 0    | 7    | 8    | 0.0   | 8.3    | No hits found                                                                                            |
| 12272 | 1   | 1  | 0    | 8    | 10   | 0.0   | 9.5    | gij195437902 ref XP_002066878.1  GK24320 [Drosophila willistoni]                                         |
| 12368 | 1   | 11 | 12   | 9    | 33   | 6.1   | 1.0    | gij91079134 ref XP_975446.1  pyrroline-5-carboxylate reductase [Tribolium castaneum]                     |
| 12505 | 0   | 0  | 52   | 0    | 52   | 26.5  | 0.0    | No hits found                                                                                            |
| 12546 | 0   | 1  | 1    | 8    | 10   | 0.5   | 9.5    | No hits found                                                                                            |
| 12603 | 0   | 1  | 0    | 16   | 17   | 0.0   | 19.0   | No hits found                                                                                            |
| 12681 | 2   | 0  | 24   | 2    | 28   | 6.1   | 2.4    | gij156369498 ref XP_001628013.1  predicted protein [Nematostella vectensis]                              |
| 12696 | 1   | 72 | 13   | 70   | 156  | 6.6   | 1.2    | gij114051313 ref NP_001040109.1  chaperonin containing t-complex polypeptide 1 subunit [Bombyx mori]     |
| 12749 | 135 | 0  | 1462 | 0    | 1597 | 5.5   | 0.0    | gij159530 gb AAA29322.1  Met-rich storage protein 3 [Manduca sexta]                                      |
| 12789 | 0   | 1  | 0    | 7    | 8    | 0.0   | 8.3    | No hits found                                                                                            |
| 12854 | 1   | 1  | 0    | 8    | 10   | 0.0   | 9.5    | gij189239183 ref XP_966847.2  bile acid $\beta$ -glucosidase [Tribolium castaneum]                       |
| 12861 | 0   | 1  | 0    | 7    | 8    | 0.0   | 8.3    | No hits found                                                                                            |
| 12892 | 0   | 0  | 0    | 12   | 12   | 0.0   | 14.2   | No hits found                                                                                            |
| 13129 | 0   | 1  | 0    | 7    | 8    | 0.0   | 8.3    | No hits found                                                                                            |
| 13190 | 15  | 0  | 117  | 9    | 141  | 4.0   | 10.7   | gij27733423 gb AAO21509.1 AF413068_1 peptidoglycan recognition protein 1 [Manduca sexta]                 |
| 13197 | 0   | 1  | 0    | 7    | 8    | 0.0   | 8.3    | No hits found                                                                                            |
| 13238 | 3   | 1  | 524  | 0    | 528  | 89.1  | 0.0    | No hits found                                                                                            |
| 13279 | 2   | 1  | 6    | 8    | 17   | 1.5   | 9.5    | gij270006307 gb EFA02755.1  hypothetical protein TcasGA2_TC008488 [Tribolium castaneum]                  |
| 13309 | 1   | 1  | 0    | 10   | 12   | 0.0   | 11.9   | No hits found                                                                                            |
| 13332 | 1   | 11 | 14   | 11   | 37   | 7.1   | 1.2    | gij157113775 ref XP_001652096.1  Asp-tRNA synthetase [Aedes aegypti]                                     |
| 13353 | 0   | 0  | 1    | 174  | 175  | 0.5   | 206.6  | gij195486646 ref XP_002091593.1  GE13745 [Drosophila yakuba]                                             |
| 13354 | 1   | 15 | 16   | 13   | 45   | 8.2   | 1.0    | gij91089963 ref XP_973647.1  conserved hypothetical protein [Tribolium castaneum]                        |
| 13425 | 0   | 1  | 0    | 7    | 8    | 0.0   | 8.3    | gij91083033 ref XP_974766.1  sterol regulatory element-binding protein cleavage activator [T. castaneum] |
| 13427 | 0   | 1  | 0    | 8    | 9    | 0.0   | 9.5    | No hits found                                                                                            |
| 13448 | 1   | 0  | 11   | 0    | 12   | 5.6   | 0.0    | No hits found                                                                                            |
| 13453 | 5   | 4  | 58   | 7    | 74   | 5.9   | 2.1    | gij45594232 gb AAS68507.1  serpin-5 [Manduca sexta]                                                      |
| 13454 | 0   | 1  | 17   | 10   | 28   | 8.7   | 11.9   | gij45594232 gb AAS68507.1  serpin-5 [Manduca sexta]                                                      |
| 13461 | 0   | 1  | 0    | 7    | 8    | 0.0   | 8.3    | gij255543198 ref XP_002512662.1  ATP binding protein, putative [Ricinus communis]                        |
| 13514 | 3   | 1  | 0    | 7    | 11   | 0.0   | 8.3    | No hits found                                                                                            |
| 13563 | 0   | 0  | 657  | 0    | 657  | 335.0 | 0.0    | gij110347786 gb ABG72695.1  attacin-like protein [Antheraea mylitta]                                     |
| 13588 | 0   | 1  | 0    | 7    | 8    | 0.0   | 8.3    | No hits found                                                                                            |
| 13678 | 0   | 0  | 0    | 19   | 19   | 0.0   | 22.6   | gij157128533 ref XP_001661472.1  hypothetical protein AaeL_AAEL011180 [Aedes aegypti]                    |
| 13731 | 0   | 1  | 0    | 7    | 8    | 0.0   | 8.3    | gij157130215 ref XP_001655645.1  hypothetical protein AaeL_AAEL011701 [Aedes aegypti]                    |
| 13778 | 1   | 0  | 14   | 0    | 15   | 7.1   | 0.0    | No hits found                                                                                            |
| 13799 | 0   | 0  | 0    | 11   | 11   | 0.0   | 13.1   | No hits found                                                                                            |
| 13861 | 0   | 1  | 0    | 7    | 8    | 0.0   | 8.3    | No hits found                                                                                            |
| 13867 | 2   | 45 | 27   | 42   | 116  | 6.9   | 1.1    | gij156541126 ref XP_001601669.1  ~ ribophorin II [Nasonia vitripennis]                                   |
| 13894 | 0   | 0  | 48   | 29   | 77   | 24.5  | 34.4   | gij112984238 ref NP_001037460.1  cecropin B precursor [Bombyx mori]                                      |
| 13916 | 1   | 0  | 741  | 0    | 742  | 377.8 | 0.0    | gij219958086 gb ACL68097.1  lebecin-related protein precursor [Manduca sexta]                            |
| 13917 | 1   | 4  | 10   | 5    | 20   | 5.1   | 1.5    | No hits found                                                                                            |
| 13918 | 0   | 0  | 25   | 8    | 33   | 12.7  | 9.5    | No hits found                                                                                            |
| 13936 | 0   | 0  | 25   | 0    | 25   | 12.7  | 0.0    | gij123725 sp P26227.1 HTIB_MANSE hemolymph trypsin inhibitor B, BPI-type                                 |
| 13942 | 1   | 17 | 19   | 13   | 50   | 9.7   | 0.9    | gij242016705 ref XP_002428888.1  predicted protein [Pediculus humanus corporis]                          |
| 13948 | 1   | 4  | 10   | 0    | 15   | 5.1   | 0.0    | No hits found                                                                                            |
| 13966 | 0   | 1  | 0    | 9    | 10   | 0.0   | 10.7   | gij190570736 ref YP_001975094.1  ankyrin repeat domain protein [Wolbachia endosymbiont of Cq Pe]         |
| 14093 | 1   | 0  | 14   | 0    | 15   | 7.1   | 0.0    | gij56418419 gb AAV91017.1  hemolymph proteinase 19 [Manduca sexta]                                       |
| 14097 | 0   | 1  | 0    | 19   | 20   | 0.0   | 22.6   | No hits found                                                                                            |
| 14100 | 0   | 0  | 8    | 1157 | 1165 | 4.1   | 1373.8 | gij195486646 ref XP_002091593.1  GE13745 [Drosophila yakuba]                                             |
| 14104 | 14  | 0  | 173  | 13   | 200  | 6.3   | 15.4   | gij27733423 gb AAO21509.1 AF413068_1 peptidoglycan recognition protein 1 [Manduca sexta]                 |
| 14154 | 0   | 1  | 0    | 9    | 10   | 0.0   | 10.7   | No hits found                                                                                            |
| 14231 | 0   | 0  | 28   | 0    | 28   | 14.3  | 0.0    | No hits found                                                                                            |
| 14248 | 0   | 6  | 0    | 196  | 202  | 0.0   | 38.8   | gij2149091 gb AAB58491.1  serpin-2 [Manduca sexta]                                                       |
| 14278 | 1   | 34 | 17   | 179  | 231  | 8.7   | 6.3    | gij83583693 gb ABC24706.1  hemocentin-like protein 1, Ig domains [Spodoptera frugiperda]                 |
| 14293 | 0   | 1  | 0    | 7    | 8    | 0.0   | 8.3    | No hits found                                                                                            |
| 14294 | 0   | 1  | 1    | 11   | 13   | 0.5   | 13.1   | No hits found                                                                                            |
| 14343 | 0   | 0  | 186  | 7    | 193  | 94.8  | 8.3    | gij67906420 gb AAY82587.1  attacin-1 [Manduca sexta]                                                     |
| 14366 | 0   | 1  | 0    | 7    | 8    | 0.0   | 8.3    | No hits found                                                                                            |
| 14380 | 0   | 0  | 106  | 0    | 106  | 54.0  | 0.0    | gij67906420 gb AAY82587.1  attacin-1 [Manduca sexta]                                                     |
| 14393 | 2   | 4  | 132  | 11   | 149  | 33.7  | 3.3    | gij27733421 gb AAO21508.1 AF413067_1 serine protease-like protein [Manduca sexta]                        |
| 14417 | 0   | 0  | 0    | 22   | 22   | 0.0   | 26.1   | gij194753400 ref XP_001959000.1  GF12273 [Drosophila ananassae]                                          |
| 14426 | 0   | 1  | 0    | 12   | 13   | 0.0   | 14.2   | No hits found                                                                                            |
| 14456 | 0   | 0  | 1    | 52   | 53   | 0.5   | 61.7   | gij2149091 gb AAB58491.1  serpin-2 [Manduca sexta]                                                       |
| 14496 | 0   | 1  | 0    | 18   | 19   | 0.0   | 21.4   | No hits found                                                                                            |
| 14515 | 2   | 0  | 34   | 0    | 36   | 8.7   | 0.0    | gij148298818 ref NP_001091784.1  multi-binding protein [Bombyx mori]                                     |
| 14568 | 0   | 0  | 2    | 68   | 70   | 1.0   | 80.7   | gij148298709 ref NP_001091749.1  possible antimicrobial peptide [Bombyx mori]                            |
| 14572 | 0   | 1  | 1    | 7    | 9    | 0.5   | 8.3    | No hits found                                                                                            |
| 14602 | 0   | 1  | 1    | 8    | 10   | 0.5   | 9.5    | No hits found                                                                                            |
| 14641 | 0   | 0  | 157  | 0    | 157  | 80.1  | 0.0    | gij67906420 gb AAY82587.1  attacin-1 [Manduca sexta]                                                     |
| 14688 | 70  | 2  | 1129 | 0    | 1201 | 8.2   | 0.0    | gij159526 gb AAA29320.1  Met-rich storage protein 1 [Manduca sexta]                                      |
| 14700 | 0   | 0  | 183  | 2    | 185  | 93.3  | 2.4    | gij260765453 gb ACX49764.1  peptidoglycan recognition protein 2 [Manduca sexta]                          |
| 14728 | 2   | 3  | 67   | 20   | 92   | 17.1  | 7.9    | gij24416622 dbj BAC22502.1  putative pheromone-degrading enzyme [Antheraea polyphemus]                   |
| 14752 | 0   | 0  | 118  | 2    | 120  | 60.2  | 2.4    | gij260765453 gb ACX49764.1  peptidoglycan recognition protein 2 [Manduca sexta]                          |



|       |    |    |      |      |      |       |       |                                                                                                  |
|-------|----|----|------|------|------|-------|-------|--------------------------------------------------------------------------------------------------|
| 14796 | 0  | 0  | 0    | 9    | 9    | 0.0   | 10.7  | gii114051980 ref NP_001040200.1  Myb-MuvB complex subunit Lin-52 [Bombyx mori]                   |
| 14832 | 0  | 0  | 0    | 10   | 10   | 0.0   | 11.9  | No hits found                                                                                    |
| 14926 | 0  | 1  | 1    | 7    | 9    | 0.5   | 8.3   | No hits found                                                                                    |
| 14937 | 13 | 0  | 164  | 0    | 177  | 6.4   | 0.0   | gii136206 sp P22297.1 TRF_MANSE transferrin precursor                                            |
| 14968 | 1  | 31 | 17   | 24   | 73   | 8.7   | 0.9   | No hits found                                                                                    |
| 14971 | 2  | 1  | 20   | 0    | 23   | 5.1   | 0.0   | gii260907839 gb ACX53721.1  esterase [Heliothis virescens]                                       |
| 14972 | 1  | 0  | 29   | 5    | 35   | 14.8  | 5.9   | gii260907839 gb ACX53721.1  esterase [Heliothis virescens]                                       |
| 14997 | 0  | 0  | 34   | 10   | 44   | 17.3  | 11.9  | gii29469965 gb AAO74638.1  antimicrobial peptide cecropin 6 [Manduca sexta]                      |
| 15006 | 0  | 1  | 0    | 7    | 8    | 0.0   | 8.3   | gii27000311 gb EEZ99558.1  hypothetical TcasGA2_TC000140 [Tribolium castaneum]                   |
| 15014 | 1  | 0  | 10   | 1    | 12   | 5.1   | 1.2   | No hits found                                                                                    |
| 15041 | 0  | 0  | 36   | 0    | 36   | 18.4  | 0.0   | gii116084 sp P14665.1 CEC5_MANSE bactericidin B-5P, cecropin-like precursor                      |
| 15055 | 1  | 1  | 16   | 0    | 18   | 8.2   | 0.0   | gii112983896 ref NP_001037394.1  paralytic peptide binding protein 1 [Bombyx mori]               |
| 15057 | 1  | 0  | 13   | 0    | 14   | 6.6   | 0.0   | No hits found                                                                                    |
| 15111 | 1  | 48 | 8    | 800  | 857  | 4.1   | 19.8  | gii2149091 gb AAB58491.1  serpin-2 [Manduca sexta]                                               |
| 15142 | 0  | 1  | 0    | 7    | 8    | 0.0   | 8.3   | gii189240401 ref XP_968302.2  optix-binding protein CG30443-PA [Tribolium castaneum]             |
| 15159 | 0  | 0  | 0    | 15   | 15   | 0.0   | 17.8  | gii15963410 dbj BAB69462.1  attacin [Samia cynthia ricini]                                       |
| 15291 | 0  | 1  | 0    | 7    | 8    | 0.0   | 8.3   | No hits found                                                                                    |
| 15299 | 0  | 1  | 0    | 7    | 8    | 0.0   | 8.3   | gii157110603 ref XP_001651170.1  eukaryotic translation initiation factor 2c [Aedes aegypti]     |
| 15311 | 1  | 3  | 38   | 13   | 55   | 19.4  | 5.1   | gii168823411 ref NP_001108339.1  carboxylesterase CarE-7 [Bombyx mori]                           |
| 15324 | 82 | 2  | 1492 | 0    | 1576 | 9.3   | 0.0   | gii5869985 emb CAB55603.1  moderately Met-rich storage protein [Spodoptera litura]               |
| 15327 | 2  | 1  | 32   | 3    | 38   | 8.2   | 3.6   | gii168823411 ref NP_001108339.1  carboxylesterase CarE-7 [Bombyx mori]                           |
| 15339 | 1  | 0  | 0    | 9    | 10   | 0.0   | 10.7  | No hits found                                                                                    |
| 15439 | 1  | 19 | 11   | 21   | 52   | 5.6   | 1.3   | No hits found                                                                                    |
| 15475 | 9  | 0  | 110  | 0    | 119  | 6.2   | 0.0   | No hits found                                                                                    |
| 15532 | 1  | 19 | 12   | 9    | 41   | 6.1   | 0.6   | gii157412326 ref NP_001098704.1  Relish2 [Bombyx mori]                                           |
| 15567 | 3  | 0  | 48   | 0    | 51   | 8.2   | 0.0   | No hits found                                                                                    |
| 15639 | 10 | 0  | 109  | 0    | 119  | 5.6   | 0.0   | gii148298818 ref NP_001091784.1  multi-binding protein [Bombyx mori]                             |
| 15667 | 0  | 1  | 2    | 10   | 13   | 1.0   | 11.9  | No hits found                                                                                    |
| 15732 | 0  | 1  | 253  | 43   | 297  | 129.0 | 51.1  | gii67906420 gb AAY82587.1  attacin-1 [Manduca sexta]                                             |
| 15741 | 1  | 1  | 0    | 11   | 13   | 0.0   | 13.1  | gii190702438 gb ACE75327.1  conserved hypothetical protein [Glyptapanteles indiensis]            |
| 15744 | 0  | 0  | 0    | 35   | 35   | 0.0   | 41.6  | gii29469969 gb AAO74640.1  antimicrobial protein attacin 2 [Manduca sexta]                       |
| 15756 | 0  | 33 | 1    | 392  | 426  | 0.5   | 14.1  | No hits found                                                                                    |
| 15822 | 0  | 2  | 1    | 19   | 22   | 0.5   | 11.3  | No hits found                                                                                    |
| 15831 | 1  | 0  | 11   | 0    | 12   | 5.6   | 0.0   | No hits found                                                                                    |
| 15852 | 0  | 0  | 134  | 0    | 134  | 68.3  | 0.0   | No hits found                                                                                    |
| 15857 | 0  | 1  | 0    | 9    | 10   | 0.0   | 10.7  | gii27733411 gb AAO21503.1 AF413062_1 leupeptin, LPS-binding [Manduca sexta]                      |
| 15899 | 0  | 1  | 1    | 7    | 9    | 0.5   | 8.3   | No hits found                                                                                    |
| 15910 | 1  | 31 | 4    | 472  | 508  | 2.0   | 18.1  | No hits found                                                                                    |
| 15931 | 40 | 37 | 1504 | 364  | 1945 | 19.2  | 11.7  | gii7327646 gb AAB31190.2  lysozyme [Manduca sexta]                                               |
| 15935 | 1  | 0  | 4    | 9    | 14   | 2.0   | 10.7  | gii195387325 ref XP_002052346.1  GJ17502 [Drosophila virilis]                                    |
| 15953 | 1  | 0  | 43   | 6    | 50   | 21.9  | 7.1   | gii67906420 gb AAY82587.1  attacin-1 [Manduca sexta]                                             |
| 15997 | 0  | 0  | 142  | 4    | 146  | 72.4  | 4.7   | gii67906420 gb AAY82587.1  attacin-1 [Manduca sexta]                                             |
| 15998 | 0  | 0  | 1    | 10   | 11   | 0.5   | 11.9  | gii73921456 gb AAZ94260.1  immune related protein X-tox [Spodoptera frugiperda]                  |
| 16018 | 0  | 0  | 40   | 12   | 52   | 20.4  | 14.2  | gii116833115 gb ABK29470.1  immune reactive putative protease inhibitor [Helicoverpa armigera]   |
| 16027 | 0  | 0  | 0    | 9    | 9    | 0.0   | 10.7  | No hits found                                                                                    |
| 16129 | 1  | 0  | 212  | 35   | 248  | 108.1 | 41.6  | gii67906420 gb AAY82587.1  attacin-1 [Manduca sexta]                                             |
| 16133 | 47 | 57 | 1719 | 440  | 2263 | 18.6  | 9.2   | gii233964 gb AAB19535.1  lysozyme [Manduca sexta]                                                |
| 16150 | 0  | 1  | 145  | 3    | 149  | 73.9  | 3.6   | gii67906420 gb AAY82587.1  attacin-1 [Manduca sexta]                                             |
| 16197 | 1  | 1  | 14   | 1    | 17   | 7.1   | 1.2   | gii24416622 dbj BAC22502.1  putative pheromone-degrading enzyme [Antheraea polyphemus]           |
| 16214 | 0  | 1  | 0    | 8    | 9    | 0.0   | 9.5   | No hits found                                                                                    |
| 16292 | 0  | 0  | 1    | 34   | 35   | 0.5   | 40.4  | gii148298709 ref NP_001091749.1  possible antimicrobial peptide [Bombyx mori]                    |
| 16383 | 0  | 0  | 98   | 0    | 98   | 50.0  | 0.0   | No hits found                                                                                    |
| 16396 | 0  | 1  | 0    | 7    | 8    | 0.0   | 8.3   | No hits found                                                                                    |
| 16399 | 0  | 2  | 56   | 10   | 68   | 28.6  | 5.9   | gii189181680 ref NP_001121191.1  carboxylesterase CarE-12 [Bombyx mori]                          |
| 16411 | 0  | 3  | 33   | 17   | 53   | 16.8  | 6.7   | gii189181680 ref NP_001121191.1  carboxylesterase CarE-12 [Bombyx mori]                          |
| 16427 | 1  | 0  | 0    | 12   | 13   | 0.0   | 14.2  | gii242010713 ref XP_002426104.1  E3 ubiquitin-protein ligase Nedd-4 [Pediculus humanus corporis] |
| 16520 | 1  | 0  | 664  | 1    | 666  | 338.6 | 1.2   | gii4262357 gb AAD14591.1  scolexin A [Manduca sexta]                                             |
| 16542 | 1  | 7  | 14   | 12   | 34   | 7.1   | 2.0   | No hits found                                                                                    |
| 16576 | 0  | 0  | 0    | 18   | 18   | 0.0   | 21.4  | gii74767320 sp Q5MGE6.1 DFFP3_LONON defense protein 3 precursor, attacin E                       |
| 16606 | 8  | 0  | 164  | 0    | 172  | 10.5  | 0.0   | gii136206 sp P22297.1 TRF_MANSE transferrin precursor                                            |
| 16643 | 0  | 1  | 0    | 17   | 18   | 0.0   | 20.2  | gii193702213 ref XP_001943843.1  vacuolar proteinsorting-associated protein [Acyrtosiphon pisum] |
| 16706 | 1  | 31 | 18   | 24   | 74   | 9.2   | 0.9   | No hits found                                                                                    |
| 16754 | 2  | 0  | 147  | 0    | 149  | 37.5  | 0.0   | No hits found                                                                                    |
| 16782 | 1  | 0  | 228  | 0    | 229  | 116.3 | 0.0   | No hits found                                                                                    |
| 16799 | 2  | 0  | 23   | 3    | 28   | 5.9   | 3.6   | No hits found                                                                                    |
| 16810 | 0  | 1  | 0    | 7    | 8    | 0.0   | 8.3   | gii189237972 ref XP_001812042.1  ~ AGAP009278-PA [Tribolium castaneum]                           |
| 16827 | 0  | 1  | 3    | 8    | 12   | 1.5   | 9.5   | No hits found                                                                                    |
| 16852 | 23 | 20 | 538  | 137  | 718  | 11.9  | 8.1   | No hits found                                                                                    |
| 16863 | 0  | 1  | 1    | 7    | 9    | 0.5   | 8.3   | No hits found                                                                                    |
| 16883 | 0  | 0  | 1    | 12   | 13   | 0.5   | 14.2  | No hits found                                                                                    |
| 16917 | 0  | 40 | 2    | 519  | 561  | 1.0   | 15.4  | gii2149091 gb AAB58491.1  serpin-2 [Manduca sexta]                                               |
| 16949 | 1  | 46 | 10   | 38   | 95   | 5.1   | 1.0   | gii195053828 ref XP_001993828.1  GH19024 [Drosophila grimshawi]                                  |
| 17020 | 2  | 0  | 29   | 0    | 31   | 7.4   | 0.0   | No hits found                                                                                    |
| 17044 | 0  | 32 | 8    | 307  | 347  | 4.1   | 11.4  | gii254746342 emb CAX16636.1  putative C1A Cys protease precursor [Manduca sexta]                 |
| 17048 | 0  | 1  | 0    | 95   | 96   | 0.0   | 112.8 | gii2149091 gb AAB58491.1  serpin-2 [Manduca sexta]                                               |
| 17051 | 0  | 1  | 0    | 7    | 8    | 0.0   | 8.3   | No hits found                                                                                    |
| 17058 | 0  | 32 | 4    | 545  | 581  | 2.0   | 20.2  | gii2149091 gb AAB58491.1  serpin-2 [Manduca sexta]                                               |
| 17080 | 0  | 0  | 25   | 3    | 28   | 12.7  | 3.6   | gii156891151 gb ABU96713.1  diapausin precursor [Spodoptera litura]                              |
| 17114 | 0  | 1  | 1    | 7    | 9    | 0.5   | 8.3   | No hits found                                                                                    |
| 17135 | 0  | 9  | 103  | 1157 | 1269 | 52.5  | 152.6 | gii110649242 emb CAL25130.1  attacin II [Manduca sexta]                                          |
| 17184 | 0  | 11 | 76   | 449  | 536  | 38.8  | 48.5  | gii73921456 gb AAZ94260.1  immune related protein, X-tox [Spodoptera frugiperda]                 |

|       |    |    |     |     |     |       |       |                                                                                          |
|-------|----|----|-----|-----|-----|-------|-------|------------------------------------------------------------------------------------------|
| 17202 | 0  | 0  | 216 | 1   | 217 | 110.1 | 1.2   | No hits found                                                                            |
| 17206 | 3  | 0  | 136 | 0   | 139 | 23.1  | 0.0   | gii136206 sp P22297.1 TRF_MANSE transferrin precursor                                    |
| 17214 | 0  | 41 | 5   | 411 | 457 | 2.5   | 11.9  | gii254746342 emb CAX16636.1  putative C1A Cys protease precursor [Manduca sexta]         |
| 17215 | 0  | 9  | 0   | 108 | 117 | 0.0   | 14.2  | gii254746342 emb CAX16636.1  putative C1A Cys protease precursor [Manduca sexta]         |
| 17301 | 1  | 0  | 272 | 0   | 273 | 138.7 | 0.0   | gii219958086 gb ACL68097.1  lebobcin-related protein precursor [Manduca sexta]           |
| 17304 | 0  | 1  | 412 | 13  | 426 | 210.1 | 15.4  | gii67906420 gb AAy82587.1  attacin-1 [Manduca sexta]                                     |
| 17316 | 0  | 0  | 98  | 0   | 98  | 50.0  | 0.0   | No hits found                                                                            |
| 17350 | 0  | 0  | 205 | 0   | 205 | 104.5 | 0.0   | gii29469969 gb AAO74640.1  antimicrobial protein attacin 2 [Manduca sexta]               |
| 17434 | 1  | 0  | 314 | 0   | 315 | 160.1 | 0.0   | gii219958086 gb ACL68097.1  lebobcin-related protein precursor [Manduca sexta]           |
| 17439 | 0  | 0  | 98  | 31  | 129 | 50.0  | 36.8  | gii110649236 emb CAL25127.1  ~ moricin [Manduca sexta]                                   |
| 17516 | 4  | 0  | 126 | 0   | 130 | 16.1  | 0.0   | gii228382 prf 1803340A Met-rich storage protein SPIA                                     |
| 17537 | 0  | 0  | 1   | 320 | 321 | 0.5   | 380.0 | No hits found                                                                            |
| 17568 | 0  | 0  | 0   | 400 | 400 | 0.0   | 474.9 | No hits found                                                                            |
| 17598 | 2  | 1  | 3   | 7   | 13  | 0.8   | 8.3   | No hits found                                                                            |
| 17610 | 9  | 2  | 82  | 159 | 252 | 4.6   | 94.4  | No hits found                                                                            |
| 17630 | 0  | 3  | 57  | 20  | 80  | 29.1  | 7.9   | gii13359096 dbj BAB33297.1  esterase-like protein (ESR-LP) [Bombyx mori]                 |
| 17631 | 0  | 14 | 20  | 90  | 124 | 10.2  | 7.6   | No hits found                                                                            |
| 17632 | 0  | 0  | 83  | 6   | 89  | 42.3  | 7.1   | gii67906420 gb AAy82587.1  attacin-1 [Manduca sexta]                                     |
| 17705 | 0  | 0  | 36  | 0   | 36  | 18.4  | 0.0   | gii67906420 gb AAy82587.1  attacin-1 [Manduca sexta]                                     |
| 17710 | 2  | 1  | 2   | 7   | 12  | 0.5   | 8.3   | No hits found                                                                            |
| 17751 | 0  | 24 | 1   | 269 | 294 | 0.5   | 13.3  | gii2149091 gb AAB58491.1  serpin-2 [Manduca sexta]                                       |
| 17764 | 0  | 1  | 0   | 8   | 9   | 0.0   | 9.5   | No hits found                                                                            |
| 17836 | 0  | 1  | 0   | 8   | 9   | 0.0   | 9.5   | No hits found                                                                            |
| 17841 | 0  | 0  | 0   | 15  | 15  | 0.0   | 17.8  | No hits found                                                                            |
| 18000 | 0  | 0  | 37  | 0   | 37  | 18.9  | 0.0   | No hits found                                                                            |
| 18001 | 0  | 1  | 0   | 7   | 8   | 0.0   | 8.3   | gii126635756 gb ABO21763.1  Toll receptor [Manduca sexta]                                |
| 18018 | 0  | 5  | 63  | 30  | 98  | 32.1  | 7.1   | No hits found                                                                            |
| 18118 | 0  | 0  | 26  | 2   | 28  | 13.3  | 2.4   | No hits found                                                                            |
| 18150 | 0  | 0  | 0   | 18  | 18  | 0.0   | 21.4  | gii148298709 ref NP_001091749.1  possible antimicrobial peptide [Bombyx mori]            |
| 18239 | 3  | 0  | 67  | 0   | 70  | 11.4  | 0.0   | gii136206 sp P22297.1 TRF_MANSE transferrin precursor                                    |
| 18262 | 0  | 0  | 10  | 83  | 93  | 5.1   | 98.5  | gii74844658 sp Q95V34.1 RS4_SPOFR 40S ribosomal protein S4                               |
| 18308 | 15 | 0  | 169 | 0   | 184 | 5.7   | 0.0   | gii136206 sp P22297.1 TRF_MANSE transferrin precursor                                    |
| 18324 | 0  | 0  | 25  | 0   | 25  | 12.7  | 0.0   | gii67906420 gb AAy82587.1  attacin-1 [Manduca sexta]                                     |
| 18431 | 0  | 1  | 0   | 9   | 10  | 0.0   | 10.7  | No hits found                                                                            |
| 18441 | 0  | 1  | 0   | 65  | 66  | 0.0   | 77.2  | gii2149091 gb AAB58491.1  serpin-2 [Manduca sexta]                                       |
| 18469 | 0  | 1  | 1   | 8   | 10  | 0.5   | 9.5   | No hits found                                                                            |
| 18544 | 0  | 1  | 0   | 7   | 8   | 0.0   | 8.3   | No hits found                                                                            |
| 18669 | 0  | 0  | 285 | 0   | 285 | 145.3 | 0.0   | gii4262357 gb AAD14591.1  scolexin A [Manduca sexta]                                     |
| 18670 | 0  | 0  | 139 | 0   | 139 | 70.9  | 0.0   | gii4262357 gb AAD14591.1  scolexin A [Manduca sexta]                                     |
| 18699 | 0  | 1  | 26  | 114 | 141 | 13.3  | 135.4 | gii148298709 ref NP_001091749.1  possible antimicrobial peptide [Bombyx mori]            |
| 18797 | 9  | 0  | 549 | 0   | 558 | 31.1  | 0.0   | gii39843367 gb AAR32136.1  VHDL receptor [Helicoverpa zea]                               |
| 18799 | 0  | 0  | 26  | 0   | 26  | 13.3  | 0.0   | No hits found                                                                            |
| 18814 | 0  | 0  | 235 | 29  | 264 | 119.8 | 34.4  | gii67906420 gb AAy82587.1  attacin-1 [Manduca sexta]                                     |
| 18819 | 0  | 5  | 59  | 405 | 469 | 30.1  | 96.2  | gii73921456 gb AAZ94260.1  immune related protein X-tox [Spodoptera frugiperda]          |
| 18869 | 0  | 13 | 0   | 101 | 114 | 0.0   | 9.2   | gii254746346 emb CAX16638.1  putative C1A Cys protease precursor [Spodoptera frugiperda] |
| 18963 | 0  | 0  | 254 | 0   | 254 | 129.5 | 0.0   | gii4262357 gb AAD14591.1  scolexin A [Manduca sexta]                                     |
| 18977 | 0  | 1  | 20  | 2   | 23  | 10.2  | 2.4   | gii67906420 gb AAy82587.1  attacin-1 [Manduca sexta]                                     |

\* RA and ARN are calculated using original read numbers as described in *Section 2.3*. Listed here are contigs with  $RA_{IF/CF} > 5$ ,  $RA_{IH/CH} > 8$ ,  $ARN_{IF} > 10$  when  $RN_{CF} = 0$ , or  $ARN_{IH} > 10$  when  $RN_{CH} = 0$ .  $RA_{IF/CF}$  and  $RA_{IH/CH}$  values are shown in red if they are greater than 5 and 8, respectively.  $ARN_{IF}$  and  $ARN_{IH}$  values are shown in blue if they are higher than 10. In the columns of RA or ARN, cells shaded yellow and blue represent fat body- and hemocyte-specific gene expression, respectively.

**Table S2. A complete list of 148 DN CIFH contigs with RA<sub>CF/IF</sub> or CH/IH >10 (or ARN<sub>CF</sub> or CH >20)**

| CIFH contig # | Original read # |      |    |      |       | RA or ARN |       | BLAST results                                                                                       |
|---------------|-----------------|------|----|------|-------|-----------|-------|-----------------------------------------------------------------------------------------------------|
|               | CF              | CH   | IF | IH   | Total | CF/IF     | CH/IH |                                                                                                     |
| 00010         | 29              | 464  | 3  | 286  | 782   | 19.0      | 1.4   | gi 242005387 ref XP_002423550.1  cAMP-dependent protein kinase subunit [Pediculus humanus corporis] |
| 00015         | 88              | 3814 | 13 | 3140 | 7055  | 13.3      | 1.0   | gi 6164595 gb AAF04457.1 AF078161_1 lacunin [Manduca sexta]                                         |
| 00248         | 7               | 200  | 1  | 155  | 363   | 13.7      | 1.1   | gi 157113908 ref XP_001657920.1  N-acetyllactosaminide β-1,3-NAG transferase [Aedes aegypti]        |
| 00379         | 10              | 308  | 1  | 184  | 503   | 19.6      | 1.4   | gi 170037242 ref XP_001846468.1  Leu-rich repeat-containing protein 1 [Culex quinquefasciatus]      |
| 00623         | 12              | 527  | 1  | 443  | 983   | 23.5      | 1.0   | gi 157132531 ref XP_001656056.1  ~ odd Oz protein [Aedes aegypti]                                   |
| 00628         | 7               | 38   | 1  | 39   | 85    | 13.7      | 0.8   | gi 170030982 ref XP_001843366.1  rho/rac/cdc GTPase-activating protein [Culex quinquefasciatus]     |
| 00773         | 49              | 12   | 93 | 1    | 155   | 1.0       | 10.1  | gi 157103945 ref XP_001648193.1  dihydropyrimidine dehydrogenase [Aedes aegypti]                    |
| 00851         | 6               | 42   | 1  | 26   | 75    | 11.8      | 1.4   | gi 158300087 ref XP_320080.3  AGAP009284-PA [Anopheles gambiae]                                     |
| 01235         | 21              | 654  | 3  | 353  | 1031  | 13.7      | 1.6   | No hits found                                                                                       |
| 01289         | 7               | 45   | 1  | 31   | 84    | 13.7      | 1.2   | gi 187281809 ref NP_001119723.1  kinesin-like protein Ncd [Bombyx mori]                             |
| 02637         | 5               | 12   | 9  | 1    | 27    | 1.1       | 10.1  | gi 116789445 gb ABK25249.1  unknown [Picea sitchensis]                                              |
| 02717         | 24              | 891  | 4  | 778  | 1697  | 11.8      | 1.0   | gi 6164595 gb AAF04457.1 AF078161_1 lacunin [Manduca sexta]                                         |
| 02730         | 8               | 15   | 8  | 1    | 32    | 2.0       | 12.6  | gi 2970687 gb AAC06038.1  β-glucosidase precursor [Spodoptera frugiperda]                           |
| 03286         | 21              | 635  | 0  | 27   | 683   | 41.2      | 19.8  | gi 254746344 emb CAX16637.1  putative C1A Cys protease precursor [Manduca sexta]                    |
| 03592         | 10              | 21   | 1  | 14   | 46    | 19.6      | 1.3   | No hits found                                                                                       |
| 03654         | 21              | 686  | 2  | 647  | 1356  | 20.6      | 0.9   | gi 157134123 ref XP_001663157.1  atlastin [Aedes aegypti]                                           |
| 03792         | 7               | 20   | 1  | 5    | 33    | 13.7      | 3.4   | gi 91090218 ref XP_968156.1  ~ E1a binding protein P400 [Tribolium castaneum]                       |
| 03996         | 6               | 6    | 1  | 6    | 19    | 11.8      | 0.8   | gi 170052039 ref XP_001862040.1  small GTP-binding protein [Culex quinquefasciatus]                 |
| 04104         | 0               | 13   | 0  | 1    | 14    | 0.0       | 10.9  | No hits found                                                                                       |
| 04344         | 0               | 12   | 0  | 1    | 13    | 0.0       | 10.1  | No hits found                                                                                       |
| 04604         | 5               | 40   | 2  | 2    | 49    | 4.9       | 16.8  | No hits found                                                                                       |
| 04970         | 6               | 23   | 1  | 18   | 48    | 11.8      | 1.1   | No hits found                                                                                       |
| 05495         | 0               | 14   | 1  | 1    | 16    | 0.0       | 11.8  | No hits found                                                                                       |
| 05560         | 24              | 965  | 4  | 440  | 1433  | 11.8      | 1.8   | gi 254746344 emb CAX16637.1  putative C1A Cys protease precursor [Manduca sexta]                    |
| 05824         | 8               | 0    | 1  | 4    | 13    | 15.7      | 0.0   | gi 116326818 ref YP_803355.1  hypothetical TnAV2c gp132 [Trichoplusia ni ascovirus 2c]              |
| 06063         | 2               | 12   | 0  | 1    | 15    | 3.9       | 10.1  | No hits found                                                                                       |
| 06283         | 17              | 720  | 1  | 207  | 945   | 33.3      | 2.9   | No hits found                                                                                       |
| 06497         | 55              | 3419 | 5  | 1335 | 4814  | 21.6      | 2.2   | gi 217262 dbj BAA03124.1  lectin [Bombyx mori]                                                      |
| 06591         | 6               | 96   | 1  | 77   | 180   | 11.8      | 1.1   | No hits found                                                                                       |
| 06713         | 0               | 12   | 0  | 1    | 13    | 0.0       | 10.1  | gi 193613364 ref XP_001943860.1  ~ limkain b1 [Acyrtosiphon pisum]                                  |
| 06902         | 12              | 3    | 2  | 0    | 17    | 11.8      | 2.5   | gi 114050917 ref NP_001040414.1  3-hydroxyacyl-CoA dehydrogenase [Bombyx mori]                      |
| 07139         | 21              | 767  | 2  | 262  | 1052  | 20.6      | 2.5   | gi 110649216 emb CAL25117.1  dVA-AP3 [Manduca sexta]                                                |
| 07210         | 3               | 14   | 0  | 1    | 18    | 5.9       | 11.8  | No hits found                                                                                       |
| 07515         | 7               | 1    | 1  | 0    | 9     | 13.7      | 0.8   | gi 158295141 ref XP_316035.4  AGAP005993-PA [Anopheles gambiae]                                     |
| 07642         | 9               | 601  | 1  | 153  | 764   | 17.7      | 3.3   | gi 55139125 gb AAV41236.1  immunectin-3 [Manduca sexta]                                             |
| 07754         | 0               | 12   | 1  | 1    | 14    | 0.0       | 10.1  | gi 17895231 ref NP_001026433.1  coiled-coil domain containing 93 [Gallus gallus]                    |
| 08034         | 1               | 12   | 1  | 1    | 15    | 2.0       | 10.1  | No hits found                                                                                       |
| 08686         | 9               | 506  | 1  | 395  | 911   | 17.7      | 1.1   | gi 82880638 gb ABB92836.1  scavenger receptor C-like protein [Spodoptera frugiperda]                |
| 08705         | 8               | 10   | 1  | 5    | 24    | 15.7      | 1.7   | gi 224084416 ref XP_002192181.1  selenium binding protein 1 [Taeniopygia guttata]                   |
| 08707         | 6               | 9    | 1  | 13   | 29    | 11.8      | 0.6   | gi 24585081 ref NP_609923.2  CG10639 [Drosophila melanogaster]                                      |
| 08801         | 1               | 14   | 1  | 1    | 17    | 2.0       | 11.8  | gi 91081401 ref XP_972667.1  ~ exosome component 8 [Tribolium castaneum]                            |
| 09511         | 11              | 0    | 1  | 0    | 12    | 21.6      | 0.0   | No hits found                                                                                       |
| 09847         | 0               | 13   | 0  | 1    | 14    | 0.0       | 10.9  | gi 194745608 ref XP_001955279.1  GF16313 [Drosophila ananassae]                                     |
| 10124         | 32              | 1637 | 4  | 1073 | 2746  | 15.7      | 1.3   | gi 114050871 ref NP_001040411.1  carboxylesterase [Bombyx mori]                                     |
| 10316         | 0               | 13   | 1  | 1    | 15    | 0.0       | 10.9  | gi 157106599 ref XP_001649397.1  hypothetical protein AaeL_AAEL004554 [Aedes aegypti]               |
| 10439         | 12              | 0    | 1  | 0    | 13    | 23.5      | 0.0   | gi 183979241 dbj BAG30782.1  cuticular protein CPR41B [Papilio xuthus]                              |
| 10495         | 0               | 16   | 1  | 1    | 18    | 0.0       | 13.5  | No hits found                                                                                       |
| 11030         | 13              | 0    | 2  | 0    | 15    | 12.7      | 0.0   | gi 3121953 sp Q25504.1 CU16_MANSE larval cuticle protein 16/17 precursor                            |
| 11098         | 40              | 0    | 3  | 0    | 43    | 26.1      | 0.0   | gi 159526 gb AAA29320.1  Met-rich storage protein 1 [Manduca sexta]                                 |
| 11161         | 0               | 12   | 1  | 1    | 14    | 0.0       | 10.1  | gi 125808686 ref XP_001360831.1  GA18253 [Drosophila pseudoobscura]                                 |
| 11280         | 62              | 3164 | 3  | 1040 | 4269  | 40.5      | 2.6   | gi 91090548 ref XP_971239.1  ~ hemolectin CG7002-PA [Tribolium castaneum]                           |
| 11888         | 27              | 955  | 3  | 468  | 1453  | 17.7      | 1.7   | No hits found                                                                                       |
| 12040         | 2               | 14   | 0  | 1    | 17    | 3.9       | 11.8  | No hits found                                                                                       |
| 12095         | 10              | 0    | 1  | 0    | 11    | 19.6      | 0.0   | gi 194741936 ref XP_001953465.1  GF17208 [Drosophila ananassae]                                     |
| 12848         | 0               | 16   | 0  | 1    | 17    | 0.0       | 13.5  | gi 2822109 sp P14730.2 EXPL_RAT extracellular matrix inhibitor, WDNM1 precursor                     |
| 12886         | 8               | 0    | 1  | 1    | 10    | 15.7      | 0.0   | No hits found                                                                                       |
| 13013         | 7               | 1    | 0  | 0    | 9     | 13.7      | 0.8   | gi 189031278 gb ACD74812.1  cuticle protein 1 [Helicoverpa armigera]                                |
| 13094         | 15              | 10   | 1  | 5    | 31    | 29.4      | 1.7   | gi 183979298 dbj BAG30762.1  ~ CG5304-PA [Papilio xuthus]                                           |
| 13345         | 7               | 0    | 1  | 0    | 8     | 13.7      | 0.0   | No hits found                                                                                       |
| 13440         | 15              | 694  | 0  | 461  | 1170  | 29.4      | 1.3   | No hits found                                                                                       |
| 13813         | 31              | 2398 | 4  | 848  | 3281  | 15.2      | 2.4   | gi 110758905 ref XP_395067.3  ~ hemolectin CG7002-PA [Apis mellifera]                               |
| 13842         | 14              | 677  | 2  | 228  | 921   | 13.7      | 2.5   | gi 138601 sp P19616.1 VITM_MANSE microvitellogenin precursor                                        |
| 14038         | 1               | 36   | 0  | 1    | 38    | 2.0       | 30.3  | No hits found                                                                                       |
| 14129         | 7               | 0    | 1  | 0    | 8     | 13.7      | 0.0   | gi 91078692 ref XP_971204.1  phospholipase A2, group VI (cytosolic, Ca-independent) [T. castaneum]  |
| 14210         | 6               | 10   | 1  | 4    | 21    | 11.8      | 2.1   | No hits found                                                                                       |
| 14370         | 11              | 879  | 0  | 307  | 1197  | 21.6      | 2.4   | No hits found                                                                                       |
| 14374         | 0               | 12   | 1  | 1    | 14    | 0.0       | 10.1  | No hits found                                                                                       |
| 14570         | 46              | 2032 | 1  | 735  | 2814  | 90.2      | 2.3   | gi 162462371 ref NP_001104817.1  lectin precursor [Bombyx mori]                                     |
| 14760         | 38              | 2505 | 1  | 902  | 3446  | 74.5      | 2.3   | gi 156545430 ref XP_001606650.1  ~ CG7002-PA [Nasonia vitripennis]                                  |
| 14781         | 28              | 0    | 3  | 1    | 32    | 18.3      | 0.0   | gi 114052677 ref NP_001040269.1  phosphoserine aminotransferase 1 [Bombyx mori]                     |
| 14979         | 12              | 288  | 0  | 233  | 533   | 23.5      | 1.0   | No hits found                                                                                       |
| 15047         | 18              | 1077 | 0  | 545  | 1640  | 35.3      | 1.7   | gi 217262 dbj BAA03124.1  lectin [Bombyx mori]                                                      |
| 15069         | 28              | 1314 | 2  | 441  | 1785  | 27.5      | 2.5   | No hits found                                                                                       |
| 15116         | 12              | 348  | 2  | 285  | 647   | 11.8      | 1.0   | gi 82880638 gb ABB92836.1  scavenger receptor C-like protein [Spodoptera frugiperda]                |
| 15132         | 9               | 0    | 1  | 0    | 10    | 17.7      | 0.0   | gi 112984526 ref NP_001037199.1  promoting protein [Bombyx mori]                                    |
| 15201         | 1               | 75   | 0  | 5    | 81    | 2.0       | 12.6  | gi 254746344 emb CAX16637.1  putative C1A Cys protease precursor [Manduca sexta]                    |
| 15250         | 31              | 1251 | 0  | 624  | 1906  | 60.8      | 1.7   | gi 162462371 ref NP_001104817.1  lectin precursor [Bombyx mori]                                     |
| 15276         | 0               | 12   | 0  | 1    | 13    | 0.0       | 10.1  | No hits found                                                                                       |
| 15380         | 35              | 2300 | 5  | 864  | 3204  | 13.7      | 2.2   | gi 162462371 ref NP_001104817.1  lectin precursor [Bombyx mori]                                     |
| 15465         | 6               | 0    | 1  | 1    | 8     | 11.8      | 0.0   | gi 170574840 ref XP_001892989.1  hypothetical Bm1_07595 [Brugia malayi]                             |
| 15506         | 52              | 2799 | 5  | 1011 | 3867  | 20.4      | 2.3   | gi 91090548 ref XP_971239.1  ~ hemolectin CG7002-PA [Tribolium castaneum]                           |
| 15594         | 13              | 975  | 1  | 255  | 1244  | 25.5      | 3.2   | gi 91090548 ref XP_971239.1  ~ hemolectin CG7002-PA [Tribolium castaneum]                           |
| 15764         | 20              | 788  | 0  | 397  | 1205  | 39.2      | 1.7   | gi 217262 dbj BAA03124.1  lectin [Bombyx mori]                                                      |
| 15792         | 21              | 1412 | 1  | 498  | 1932  | 41.2      | 2.4   | gi 162462371 ref NP_001104817.1  lectin precursor [Bombyx mori]                                     |
| 16105         | 10              | 23   | 1  | 42   | 76    | 19.6      | 0.5   | gi 91087179 ref XP_975411.1  ~ CG9471-PB [Tribolium castaneum]                                      |
| 16288         | 17              | 747  | 1  | 285  | 1050  | 33.3      | 2.2   | gi 2738863 gb AAB94557.1  hemocyte protease-1 [Manduca sexta]                                       |
| 16289         | 49              | 3216 | 5  | 1212 | 4482  | 19.2      | 2.2   | gi 162462371 ref NP_001104817.1  lectin precursor [Bombyx mori]                                     |
| 16291         | 28              | 1004 | 1  | 323  | 1356  | 54.9      | 2.6   | gi 162462371 ref NP_001104817.1  lectin precursor [Bombyx mori]                                     |



|       |    |      |   |      |      |      |      |                                                                                   |
|-------|----|------|---|------|------|------|------|-----------------------------------------------------------------------------------|
| 16594 | 33 | 1997 | 2 | 695  | 2727 | 32.4 | 2.4  | gii162462371 ref NP_001104817.1  lectin precursor [Bombyx mori]                   |
| 16677 | 26 | 1278 | 0 | 500  | 1804 | 51.0 | 2.2  | gii217262 dbj BAA03124.1  lectin [Bombyx mori]                                    |
| 16719 | 30 | 1364 | 2 | 511  | 1907 | 29.4 | 2.2  | gii2738863 gb AAB94557.1  hemocyte protease-1 [Manduca sexta]                     |
| 16801 | 43 | 1480 | 4 | 565  | 2092 | 21.1 | 2.2  | gii217262 dbj BAA03124.1  lectin [Bombyx mori]                                    |
| 16808 | 1  | 15   | 0 | 1    | 17   | 2.0  | 12.6 | No hits found                                                                     |
| 16842 | 29 | 1594 | 2 | 635  | 2260 | 28.4 | 2.1  | gii162462371 ref NP_001104817.1  lectin precursor [Bombyx mori]                   |
| 16877 | 29 | 986  | 2 | 304  | 1321 | 28.4 | 2.7  | gii217262 dbj BAA03124.1  lectin [Bombyx mori]                                    |
| 16886 | 15 | 874  | 0 | 431  | 1320 | 29.4 | 1.7  | gii217262 dbj BAA03124.1  lectin [Bombyx mori]                                    |
| 16922 | 35 | 1134 | 1 | 661  | 1831 | 68.6 | 1.4  | gii114050871 ref NP_001040411.1  carboxylesterase [Bombyx mori]                   |
| 16927 | 22 | 839  | 1 | 401  | 1263 | 43.1 | 1.8  | No hits found                                                                     |
| 17085 | 52 | 2317 | 4 | 1666 | 4039 | 25.5 | 1.2  | gii74763772 sp O44249.3 PRP1_MANSE proPO-p1                                       |
| 17102 | 16 | 933  | 1 | 330  | 1280 | 31.4 | 2.4  | gii2738863 gb AAB94557.1  hemocyte protease-1 [Manduca sexta]                     |
| 17159 | 33 | 1207 | 0 | 424  | 1664 | 64.7 | 2.4  | gii162462371 ref NP_001104817.1  lectin precursor [Bombyx mori]                   |
| 17174 | 21 | 742  | 0 | 341  | 1104 | 41.2 | 1.8  | No hits found                                                                     |
| 17315 | 51 | 2439 | 9 | 1676 | 4175 | 11.1 | 1.2  | gii74763772 sp O44249.3 PRP1_MANSE proPO-p1                                       |
| 17330 | 24 | 1162 | 2 | 729  | 1917 | 23.5 | 1.3  | gii114050871 ref NP_001040411.1  carboxylesterase [Bombyx mori]                   |
| 17420 | 34 | 1330 | 1 | 774  | 2139 | 66.7 | 1.4  | gii74763772 sp O44249.3 PRP1_MANSE proPO-p1                                       |
| 17421 | 24 | 1184 | 0 | 476  | 1684 | 47.1 | 2.1  | gii162462371 ref NP_001104817.1  lectin precursor [Bombyx mori]                   |
| 17469 | 10 | 695  | 1 | 510  | 1216 | 19.6 | 1.1  | No hits found                                                                     |
| 17471 | 23 | 1173 | 0 | 491  | 1687 | 45.1 | 2.0  | gii162462371 ref NP_001104817.1  lectin precursor [Bombyx mori]                   |
| 17582 | 31 | 1551 | 4 | 544  | 2130 | 15.2 | 2.4  | No hits found                                                                     |
| 17612 | 13 | 895  | 2 | 739  | 1649 | 12.7 | 1.0  | gii74763772 sp O44249.3 PRP1_MANSE proPO-p1                                       |
| 17629 | 21 | 1086 | 4 | 677  | 1788 | 10.3 | 1.4  | gii74763772 sp O44249.3 PRP1_MANSE proPO-p1                                       |
| 17637 | 6  | 0    | 1 | 0    | 7    | 11.8 | 0.0  | No hits found                                                                     |
| 17650 | 12 | 668  | 2 | 451  | 1133 | 11.8 | 1.2  | No hits found                                                                     |
| 17700 | 19 | 549  | 1 | 189  | 758  | 37.3 | 2.4  | gii217262 dbj BAA03124.1  lectin [Bombyx mori]                                    |
| 17732 | 20 | 1241 | 3 | 447  | 1711 | 13.1 | 2.3  | gii162462371 ref NP_001104817.1  lectin precursor [Bombyx mori]                   |
| 17735 | 7  | 1    | 1 | 1    | 10   | 13.7 | 0.8  | No hits found                                                                     |
| 17769 | 21 | 1312 | 2 | 476  | 1811 | 20.6 | 2.3  | gii162462371 ref NP_001104817.1  lectin precursor [Bombyx mori]                   |
| 17829 | 12 | 612  | 0 | 397  | 1021 | 23.5 | 1.3  | No hits found                                                                     |
| 17958 | 25 | 1323 | 3 | 940  | 2291 | 16.3 | 1.2  | gii75038472 sp Q25519.3 PRP2_MANSE proPO-p2                                       |
| 17978 | 16 | 301  | 3 | 114  | 434  | 10.5 | 2.2  | gii254746344 emb CAX16637.1  putative C1A Cys protease precursor [Manduca sexta]  |
| 18004 | 49 | 1944 | 9 | 1436 | 3438 | 10.7 | 1.1  | gii75038472 sp Q25519.3 PRP2_MANSE proPO-p2                                       |
| 18032 | 22 | 1216 | 0 | 441  | 1679 | 43.1 | 2.3  | gii162462371 ref NP_001104817.1  lectin precursor [Bombyx mori]                   |
| 18045 | 19 | 867  | 2 | 282  | 1170 | 18.6 | 2.6  | gii156545430 ref XP_001606650.1  ~ CG7002-PA [Nasonia vitripennis]                |
| 18065 | 21 | 905  | 4 | 712  | 1642 | 10.3 | 1.1  | gii74763772 sp O44249.3 PRP1_MANSE proPO-p1                                       |
| 18067 | 18 | 987  | 2 | 352  | 1359 | 17.7 | 2.4  | gii162462371 ref NP_001104817.1  lectin precursor [Bombyx mori]                   |
| 18097 | 22 | 960  | 0 | 348  | 1330 | 43.1 | 2.3  | gii162462371 ref NP_001104817.1  lectin precursor [Bombyx mori]                   |
| 18235 | 22 | 992  | 2 | 328  | 1344 | 21.6 | 2.5  | No hits found                                                                     |
| 18261 | 11 | 790  | 1 | 308  | 1110 | 21.6 | 2.2  | No hits found                                                                     |
| 18286 | 29 | 1294 | 1 | 404  | 1728 | 56.9 | 2.7  | gii162462371 ref NP_001104817.1  lectin precursor [Bombyx mori]                   |
| 18304 | 18 | 669  | 0 | 291  | 978  | 35.3 | 1.9  | No hits found                                                                     |
| 18325 | 22 | 1278 | 2 | 470  | 1772 | 21.6 | 2.3  | No hits found                                                                     |
| 18326 | 11 | 484  | 0 | 213  | 708  | 21.6 | 1.9  | gii162462371 ref NP_001104817.1  lectin precursor [Bombyx mori]                   |
| 18335 | 2  | 15   | 0 | 1    | 18   | 3.9  | 12.6 | No hits found                                                                     |
| 18463 | 24 | 1035 | 1 | 636  | 1696 | 47.1 | 1.4  | gii74763772 sp O44249.3 PRP1_MANSE proPO-p1                                       |
| 18480 | 13 | 574  | 0 | 201  | 788  | 25.5 | 2.4  | No hits found                                                                     |
| 18482 | 11 | 0    | 0 | 0    | 11   | 21.6 | 0.0  | gii114240 sp P14296.1 ARYA_MANSE arylphorin $\alpha$ subunit precursor            |
| 18516 | 56 | 2042 | 7 | 1293 | 3398 | 15.7 | 1.3  | gii75038472 sp Q25519.3 PRP2_MANSE proPO-p2                                       |
| 18551 | 16 | 928  | 2 | 283  | 1229 | 15.7 | 2.8  | gii91090548 ref XP_971239.1  ~ hemolectin CG7002-PA [Tribolium castaneum]         |
| 18611 | 0  | 12   | 4 | 1    | 17   | 0.0  | 10.1 | gii12585261 sp Q9U639.1 HSP7D_MANSE heat shock 70 kDa protein cognate 4 (Hsp70-4) |
| 18719 | 10 | 475  | 1 | 140  | 626  | 19.6 | 2.9  | gii162462371 ref NP_001104817.1  lectin precursor [Bombyx mori]                   |
| 18721 | 15 | 456  | 0 | 212  | 683  | 29.4 | 1.8  | gii162462371 ref NP_001104817.1  lectin precursor [Bombyx mori]                   |
| 18766 | 20 | 895  | 1 | 665  | 1581 | 39.2 | 1.1  | No hits found                                                                     |
| 18794 | 15 | 527  | 0 | 284  | 826  | 29.4 | 1.6  | gii162462371 ref NP_001104817.1  lectin precursor [Bombyx mori]                   |
| 18816 | 9  | 851  | 1 | 259  | 1120 | 17.7 | 2.8  | No hits found                                                                     |
| 18860 | 24 | 705  | 1 | 385  | 1115 | 47.1 | 1.5  | gii114050871 ref NP_001040411.1  carboxylesterase [Bombyx mori]                   |
| 18887 | 20 | 1028 | 2 | 575  | 1625 | 19.6 | 1.5  | gii74763772 sp O44249.3 PRP1_MANSE proPO-p1                                       |
| 18892 | 6  | 0    | 1 | 0    | 7    | 11.8 | 0.0  | No hits found                                                                     |
| 18997 | 24 | 1064 | 3 | 383  | 1474 | 15.7 | 2.3  | gii162462371 ref NP_001104817.1  lectin precursor [Bombyx mori]                   |

\* RA and ARN are calculated using original read numbers as described in Section 2.3. Listed here are contigs with  $RA_{CF/IF} > 10$ ,  $RA_{CH/IH} > 10$ ,  $ARN_{CF} > 20$  when  $RN_{IF} = 0$ , or  $ARN_{CH} > 20$  when  $RN_{IH} = 0$ .  $RA_{CF/IF}$  and  $RA_{CH/IH}$  values are shown in red if they are greater than 10, whereas  $ARN_{CF}$  and  $ARN_{CH}$  values are shown in blue if they are higher than 20. In the columns of RA or ARN, cells shaded yellow and blue represent fat body- and hemocyte-specific gene expression, respectively.

**Table S3. A complete list of 161 HC CIFH contigs with RA<sub>CH/CF</sub> or IH/IF >40 (or ARN<sub>CH</sub> or IH >80)**

| CIFH contig # | Original read # |      |    |      |       | RA or ARN |       | BLAST results                                                                                                     |
|---------------|-----------------|------|----|------|-------|-----------|-------|-------------------------------------------------------------------------------------------------------------------|
|               | CF              | CH   | IF | IH   | Total | CH/CF     | IH/IF |                                                                                                                   |
| 00010         | 29              | 464  | 3  | 286  | 782   | 3.3       | 46.0  | gi 242005387 ref XP_002423550.1  cAMP-dependent protein kinase catalytic subunit [Pediculus humanus corporis]     |
| 00015         | 88              | 3814 | 13 | 3140 | 7055  | 9.0       | 116.6 | gi 6164595 gb AAF04457.1 AF078161_1 lacunin [Manduca sexta]                                                       |
| 00028         | 13              | 958  | 4  | 754  | 1729  | 15.3      | 91.0  | gi 91081003 ref XP_975140.1  ~ odd Oz protein [Tribolium castaneum]                                               |
| 00145         | 4               | 229  | 1  | 177  | 411   | 11.9      | 85.4  | No hits found                                                                                                     |
| 00248         | 7               | 200  | 1  | 155  | 363   | 5.9       | 74.8  | gi 157113908 ref XP_001657920.1  N-acetyllactosaminidase β-1,3-NAG transferase [Aedes aegypti]                    |
| 00379         | 10              | 308  | 1  | 184  | 503   | 6.4       | 88.8  | gi 170037242 ref XP_001846468.1  Leu-rich repeat-containing protein 1 [Culex quinquefasciatus]                    |
| 00541         | 14              | 567  | 7  | 760  | 1348  | 8.4       | 52.4  | gi 170029717 ref XP_001842738.1  Leu-rich repeat-containing G-protein coupled receptor 4 [Culex quinquefasciatus] |
| 00569         | 4               | 182  | 1  | 176  | 363   | 9.4       | 85.0  | gi 283135216 ref NP_001164363.1  homeobox protein prospero [Nasonia vitripennis]                                  |
| 00623         | 12              | 527  | 1  | 443  | 983   | 9.1       | 213.8 | gi 157132531 ref XP_001656056.1  odd Oz protein [Aedes aegypti]                                                   |
| 00752         | 0               | 38   | 1  | 164  | 203   | 7.9       | 79.2  | gi 194859640 ref XP_001969420.1  GG23966 [Drosophila erecta]                                                      |
| 00802         | 3               | 203  | 3  | 253  | 462   | 14.0      | 40.7  | gi 260840271 ref XP_002613791.1  hypothetical BRAFLDRAFT_85332 [Branchiostoma floridae]                           |
| 00839         | 3               | 340  | 1  | 226  | 570   | 23.5      | 109.1 | gi 242021897 ref XP_002431379.1  conserved hypothetical protein [Pediculus humanus corporis]                      |
| 00882         | 7               | 268  | 0  | 261  | 536   | 7.9       | 126.0 | gi 112983326 ref NP_001037620.1  ras-related GTP-binding protein Rab3 [Bombyx mori]                               |
| 01064         | 5               | 134  | 1  | 116  | 256   | 5.6       | 56.0  | gi 48095930 ref XP_394560.1  Jagged-1 precursor [Jagged1, hJ1, CD339 antigen] [Apis mellifera]                    |
| 01235         | 21              | 654  | 3  | 353  | 1031  | 6.5       | 56.8  | No hits found                                                                                                     |
| 01311         | 9               | 608  | 3  | 483  | 1103  | 14.0      | 77.7  | No hits found                                                                                                     |
| 01429         | 6               | 238  | 2  | 180  | 426   | 8.2       | 43.4  | gi 157134123 ref XP_001663157.1  atlastin [Aedes aegypti]                                                         |
| 01609         | 1               | 71   | 1  | 144  | 217   | 14.7      | 69.5  | gi 134001247 gb ABO45233.1  reverse transcriptase [Ostrinia nubilalis]                                            |
| 01945         | 1               | 134  | 1  | 109  | 245   | 27.8      | 52.6  | No hits found                                                                                                     |
| 02159         | 3               | 101  | 1  | 144  | 249   | 7.0       | 69.5  | gi 114052056 ref NP_001040346.1  septin [Bombyx mori]                                                             |
| 02473         | 10              | 255  | 2  | 382  | 649   | 5.3       | 92.2  | gi 281362668 ref NP_651533.2  eater [Drosophila melanogaster]                                                     |
| 02717         | 24              | 891  | 4  | 778  | 1697  | 7.7       | 93.9  | gi 6164595 gb AAF04457.1 AF078161_1 lacunin [Manduca sexta]                                                       |
| 02852         | 23              | 1128 | 7  | 885  | 2043  | 10.2      | 61.0  | gi 66391199 ref YP_239364.1  hypothetical protein [Microplitis demolitor bracovirus]                              |
| 02964         | 3               | 204  | 1  | 107  | 315   | 14.1      | 51.6  | No hits found                                                                                                     |
| 02977         | 16              | 524  | 5  | 752  | 1297  | 6.8       | 72.6  | No hits found                                                                                                     |
| 03225         | 1               | 25   | 1  | 143  | 170   | 5.2       | 69.0  | gi 195445668 ref XP_002070431.1  GK11035 [Drosophila willistoni]                                                  |
| 03246         | 3               | 80   | 1  | 129  | 213   | 5.5       | 62.3  | gi 83583697 gb ABC24708.1  G protein-coupled receptor [Spodoptera frugiperda]                                     |
| 03287         | 7               | 493  | 0  | 237  | 737   | 14.6      | 114.4 | gi 114052174 ref NP_001040228.1  aminoacylase [Bombyx mori]                                                       |
| 03390         | 3               | 211  | 1  | 106  | 321   | 14.6      | 51.2  | No hits found                                                                                                     |
| 03654         | 21              | 686  | 2  | 647  | 1356  | 6.8       | 156.2 | gi 157134123 ref XP_001663157.1  atlastin [Aedes aegypti]                                                         |
| 04085         | 0               | 34   | 3  | 268  | 305   | 7.0       | 43.1  | gi 206725499 ref NP_001128673.1  cathepsin L like protein [Bombyx mori]                                           |
| 04278         | 3               | 141  | 1  | 154  | 299   | 9.7       | 74.3  | gi 270001550 gb EEZ97997.1  hypothetical TcasGA2_TC000395 [Tribolium castaneum]                                   |
| 04746         | 0               | 0    | 7  | 608  | 615   | 0.0       | 41.9  | gi 195486646 ref XP_002091593.1  GE13745 [Drosophila yakuba]                                                      |
| 05560         | 24              | 965  | 4  | 440  | 1433  | 8.3       | 53.1  | gi 254746344 emb CAX16637.1  putative C1A Cys protease precursor [Manduca sexta]                                  |
| 05577         | 4               | 157  | 22 | 1895 | 2078  | 8.1       | 41.6  | gi 254746342 emb CAX16636.1  putative C1A Cys protease precursor [Manduca sexta]                                  |
| 05933         | 1               | 189  | 1  | 141  | 332   | 39.2      | 68.1  | gi 82880638 gb ABB92836.1  scavenger receptor C-like protein [Spodoptera frugiperda]                              |
| 06283         | 17              | 720  | 1  | 207  | 945   | 8.8       | 99.9  | No hits found                                                                                                     |
| 06319         | 1               | 102  | 1  | 116  | 220   | 21.1      | 56.0  | gi 83583697 gb ABC24708.1  G protein-coupled receptor [Spodoptera frugiperda]                                     |
| 06497         | 55              | 3419 | 5  | 1335 | 4814  | 12.9      | 128.9 | gi 217262 dbj BAA03124.1  lectin [Bombyx mori]                                                                    |
| 07139         | 21              | 767  | 2  | 262  | 1052  | 7.6       | 63.2  | gi 110649216 emb CAL25117.1  dVA-AP3 [Manduca sexta]                                                              |
| 07199         | 2               | 73   | 1  | 102  | 178   | 7.6       | 49.2  | gi 110649250 emb CAL25134.1  immulectin III [Manduca sexta]                                                       |
| 07480         | 3               | 248  | 2  | 193  | 446   | 17.1      | 46.6  | gi 91086517 ref XP_971701.1  ~Ntr CG6698-PA [Tribolium castaneum]                                                 |
| 07642         | 9               | 601  | 1  | 153  | 764   | 13.8      | 73.9  | gi 55139125 gb AAV41236.1  immulectin-3 [Manduca sexta]                                                           |
| 07883         | 0               | 0    | 3  | 792  | 795   | 0.0       | 127.4 | gi 157128533 ref XP_001661472.1  hypothetical protein AaeL_AAEL011180 [Aedes aegypti]                             |
| 08216         | 1               | 43   | 1  | 84   | 129   | 8.9       | 40.5  | No hits found                                                                                                     |
| 08524         | 9               | 336  | 2  | 662  | 1009  | 7.7       | 159.8 | gi 2738863 gb AAB94557.1  hemocyte protease-1 [Manduca sexta]                                                     |
| 08561         | 0               | 0    | 3  | 353  | 356   | 0.0       | 56.8  | No hits found                                                                                                     |
| 08686         | 9               | 506  | 1  | 395  | 911   | 11.7      | 190.7 | gi 82880638 gb ABB92836.1  scavenger receptor SR-C-like protein [Spodoptera frugiperda]                           |
| 09035         | 0               | 1    | 2  | 723  | 726   | 0.2       | 174.5 | No hits found                                                                                                     |
| 10124         | 32              | 1637 | 4  | 1073 | 2746  | 10.6      | 129.5 | gi 114050871 ref NP_001040411.1  carboxylesterase [Bombyx mori]                                                   |
| 11280         | 62              | 3164 | 3  | 1040 | 4269  | 10.6      | 167.3 | gi 91090548 ref XP_971239.1  ~ hemolectin CG7002-PA [Tribolium castaneum]                                         |
| 11888         | 27              | 955  | 3  | 468  | 1453  | 7.3       | 75.3  | No hits found                                                                                                     |
| 12527         | 2               | 101  | 1  | 196  | 300   | 10.5      | 94.6  | gi 2738863 gb AAB94557.1  hemocyte protease-1 [Manduca sexta]                                                     |
| 13271         | 5               | 212  | 1  | 139  | 357   | 8.8       | 67.1  | gi 82880638 gb ABB92836.1  scavenger receptor SR-C-like protein [Spodoptera frugiperda]                           |
| 13353         | 0               | 0    | 1  | 174  | 175   | 0.0       | 84.0  | gi 195486646 ref XP_002091593.1  GE13745 [Drosophila yakuba]                                                      |
| 13440         | 15              | 694  | 0  | 461  | 1170  | 9.6       | 222.5 | No hits found                                                                                                     |
| 13452         | 6               | 374  | 0  | 240  | 620   | 12.9      | 115.8 | gi 55139125 gb AAV41236.1  immulectin-3 [Manduca sexta]                                                           |
| 13813         | 31              | 2398 | 4  | 848  | 3281  | 16.0      | 102.3 | gi 110758905 ref XP_395067.3  ~Hemolectin CG7002-PA [Apis mellifera]                                              |
| 13842         | 14              | 677  | 2  | 228  | 921   | 10.0      | 55.0  | gi 138601 sp P19616.1 VITM_MANSE microvitellogenin precursor                                                      |
| 14100         | 0               | 0    | 8  | 1157 | 1165  | 0.0       | 69.8  | gi 195486646 ref XP_002091593.1  GE13745 [Drosophila yakuba]                                                      |
| 14248         | 0               | 6    | 0  | 196  | 202   | 1.2       | 94.6  | gi 2149091 gb AAB58491.1  serpin-2 [Manduca sexta]                                                                |
| 14370         | 11              | 879  | 0  | 307  | 1197  | 16.6      | 148.2 | No hits found                                                                                                     |
| 14570         | 46              | 2032 | 1  | 735  | 2814  | 9.2       | 354.8 | gi 162462371 ref NP_001104817.1  lectin precursor [Bombyx mori]                                                   |
| 14760         | 38              | 2505 | 1  | 902  | 3446  | 13.7      | 435.4 | gi 156545430 ref XP_001606650.1  ~CG7002-PA [Nasonia vitripennis]                                                 |
| 14811         | 5               | 136  | 1  | 121  | 263   | 5.6       | 58.4  | gi 221055473 ref XP_002258875.1  hypothetical, conserved in Plasmodium [Plasmodium knowlesi]                      |
| 14979         | 12              | 288  | 0  | 233  | 533   | 5.0       | 112.5 | No hits found                                                                                                     |
| 14991         | 2               | 271  | 2  | 169  | 444   | 28.1      | 40.8  | gi 55139125 gb AAV41236.1  immulectin-3 [Manduca sexta]                                                           |
| 15047         | 18              | 1077 | 0  | 545  | 1640  | 12.4      | 263.1 | gi 217262 dbj BAA03124.1  lectin [Bombyx mori]                                                                    |
| 15069         | 28              | 1314 | 2  | 441  | 1785  | 9.7       | 106.4 | No hits found                                                                                                     |
| 15111         | 1               | 48   | 8  | 800  | 857   | 9.9       | 48.3  | gi 2149091 gb AAB58491.1  serpin-2 [Manduca sexta]                                                                |
| 15112         | 41              | 1848 | 10 | 1129 | 3028  | 9.3       | 54.5  | gi 114050871 ref NP_001040411.1  carboxylesterase [Bombyx mori]                                                   |
| 15116         | 12              | 348  | 2  | 285  | 647   | 6.0       | 68.8  | gi 82880638 gb ABB92836.1  scavenger receptor C-like protein [Spodoptera frugiperda]                              |
| 15250         | 31              | 1251 | 0  | 624  | 1906  | 8.4       | 301.2 | gi 162462371 ref NP_001104817.1  lectin precursor [Bombyx mori]                                                   |
| 15269         | 7               | 368  | 3  | 309  | 687   | 10.9      | 49.7  | gi 6164595 gb AAF04457.1 AF078161_1 lacunin [Manduca sexta]                                                       |
| 15350         | 8               | 425  | 2  | 316  | 751   | 11.0      | 76.3  | gi 82880638 gb ABB92836.1  scavenger receptor C-like protein [Spodoptera frugiperda]                              |
| 15380         | 35              | 2300 | 5  | 864  | 3204  | 13.6      | 83.4  | gi 162462371 ref NP_001104817.1  lectin precursor [Bombyx mori]                                                   |
| 15506         | 52              | 2799 | 5  | 1011 | 3867  | 11.2      | 97.6  | gi 91090548 ref XP_971239.1  ~ hemolectin CG7002-PA [Tribolium castaneum]                                         |
| 15564         | 4               | 182  | 1  | 119  | 306   | 9.4       | 57.4  | gi 82880638 gb ABB92836.1  scavenger receptor SR-C-like protein [Spodoptera frugiperda]                           |
| 15584         | 3               | 241  | 1  | 202  | 447   | 16.7      | 97.5  | gi 66535330 ref XP_623280.1  ~ atlastin CG6668-PA, isoformA [Apis mellifera]                                      |
| 15594         | 13              | 975  | 1  | 255  | 1244  | 15.5      | 123.1 | gi 91090548 ref XP_971239.1  ~ hemolectin CG7002-PA [Tribolium castaneum]                                         |
| 15756         | 0               | 33   | 1  | 392  | 426   | 6.8       | 189.2 | No hits found                                                                                                     |
| 15764         | 20              | 788  | 0  | 397  | 1205  | 8.2       | 191.6 | gi 217262 dbj BAA03124.1  lectin [Bombyx mori]                                                                    |
| 15792         | 21              | 1412 | 1  | 498  | 1932  | 13.9      | 240.4 | gi 162462371 ref NP_001104817.1  lectin precursor [Bombyx mori]                                                   |
| 15820         | 4               | 168  | 2  | 209  | 383   | 8.7       | 50.4  | No hits found                                                                                                     |
| 15910         | 1               | 31   | 4  | 472  | 508   | 6.4       | 57.0  | No hits found                                                                                                     |
| 15986         | 12              | 846  | 3  | 265  | 1126  | 14.6      | 42.6  | gi 217262 dbj BAA03124.1  lectin [Bombyx mori]                                                                    |
| 16278         | 9               | 821  | 0  | 405  | 1235  | 18.9      | 195.5 | gi 162462371 ref NP_001104817.1  lectin precursor [Bombyx mori]                                                   |
| 16288         | 17              | 747  | 1  | 285  | 1050  | 9.1       | 137.6 | gi 2738863 gb AAB94557.1  hemocyte protease-1 [Manduca sexta]                                                     |

|       |    |      |    |      |      |      |       |                                                                            |
|-------|----|------|----|------|------|------|-------|----------------------------------------------------------------------------|
| 16289 | 49 | 3216 | 5  | 1212 | 4482 | 13.6 | 117.0 | gij162462371 ref NP_001104817.1  lectin precursor [Bombyx mori]            |
| 16291 | 28 | 1004 | 1  | 323  | 1356 | 7.4  | 155.9 | gij162462371 ref NP_001104817.1  lectin precursor [Bombyx mori]            |
| 16452 | 3  | 178  | 0  | 166  | 347  | 12.3 | 80.1  | No hits found                                                              |
| 16594 | 33 | 1997 | 2  | 695  | 2727 | 12.5 | 167.7 | gij162462371 ref NP_001104817.1  lectin precursor [Bombyx mori]            |
| 16627 | 6  | 484  | 0  | 227  | 717  | 16.7 | 109.6 | gij114050871 ref NP_001040411.1  carboxylesterase [Bombyx mori]            |
| 16677 | 26 | 1278 | 0  | 500  | 1804 | 10.2 | 241.3 | gij217262 dbj BAA03124.1  lectin [Bombyx mori]                             |
| 16719 | 30 | 1364 | 2  | 511  | 1907 | 9.4  | 123.3 | gij2738863 gb AAB94557.1  hemocyte protease-1 [Manduca sexta]              |
| 16801 | 43 | 1480 | 4  | 565  | 2092 | 7.1  | 68.2  | gij217262 dbj BAA03124.1  lectin [Bombyx mori]                             |
| 16815 | 6  | 564  | 0  | 332  | 902  | 19.5 | 160.3 | gij75038472 sp Q25519.3 PRP2_MANSE Phenoloxidase subunit 2, proPO-p2       |
| 16831 | 3  | 188  | 1  | 160  | 352  | 13.0 | 77.2  | No hits found                                                              |
| 16842 | 29 | 1594 | 2  | 635  | 2260 | 11.4 | 153.3 | gij162462371 ref NP_001104817.1  lectin precursor [Bombyx mori]            |
| 16877 | 29 | 986  | 2  | 304  | 1321 | 7.0  | 73.4  | gij217262 dbj BAA03124.1  lectin [Bombyx mori]                             |
| 16886 | 15 | 874  | 0  | 431  | 1320 | 12.1 | 208.0 | gij217262 dbj BAA03124.1  lectin [Bombyx mori]                             |
| 16917 | 0  | 40   | 2  | 519  | 561  | 8.3  | 125.3 | gij2149091 gb AAB58491.1  serpin-2 [Manduca sexta]                         |
| 16922 | 35 | 1134 | 1  | 661  | 1831 | 6.7  | 319.1 | gij114050871 ref NP_001040411.1  carboxylesterase [Bombyx mori]            |
| 16927 | 22 | 839  | 1  | 401  | 1263 | 7.9  | 193.6 | No hits found                                                              |
| 17058 | 0  | 32   | 4  | 545  | 581  | 6.6  | 65.8  | gij2149091 gb AAB58491.1  serpin-2 [Manduca sexta]                         |
| 17085 | 52 | 2317 | 4  | 1666 | 4039 | 9.2  | 201.0 | gij74763772 sp O44249.3 PRP1_MANSE proPO-p1                                |
| 17102 | 16 | 933  | 1  | 330  | 1280 | 12.1 | 159.3 | gij2738863 gb AAB94557.1  hemocyte protease-1 [Manduca sexta]              |
| 17159 | 33 | 1207 | 0  | 424  | 1664 | 7.6  | 204.7 | gij162462371 ref NP_001104817.1  lectin precursor [Bombyx mori]            |
| 17174 | 21 | 742  | 0  | 341  | 1104 | 7.3  | 164.6 | No hits found                                                              |
| 17252 | 8  | 648  | 2  | 305  | 963  | 16.8 | 73.6  | No hits found                                                              |
| 17315 | 51 | 2439 | 9  | 1676 | 4175 | 9.9  | 89.9  | gij74763772 sp O44249.3 PRP1_MANSE proPO-p1                                |
| 17330 | 24 | 1162 | 2  | 729  | 1917 | 10.0 | 175.9 | gij114050871 ref NP_001040411.1  carboxylesterase [Bombyx mori]            |
| 17353 | 10 | 429  | 3  | 255  | 697  | 8.9  | 41.0  | No hits found                                                              |
| 17417 | 36 | 1458 | 9  | 950  | 2453 | 8.4  | 51.0  | gij75038472 sp Q25519.3 PRP2_MANSE proPO-p2                                |
| 17420 | 34 | 1330 | 1  | 774  | 2139 | 8.1  | 373.6 | gij74763772 sp O44249.3 PRP1_MANSE proPO-p1                                |
| 17421 | 24 | 1184 | 0  | 476  | 1684 | 10.2 | 229.8 | gij162462371 ref NP_001104817.1  lectin precursor [Bombyx mori]            |
| 17469 | 10 | 695  | 1  | 510  | 1216 | 14.4 | 246.2 | No hits found                                                              |
| 17471 | 23 | 1173 | 0  | 491  | 1687 | 10.6 | 237.0 | gij162462371 ref NP_001104817.1  lectin precursor [Bombyx mori]            |
| 17491 | 10 | 927  | 0  | 255  | 1192 | 19.2 | 123.1 | No hits found                                                              |
| 17537 | 0  | 0    | 1  | 320  | 321  | 0.0  | 154.5 | No hits found                                                              |
| 17554 | 8  | 372  | 0  | 316  | 696  | 9.6  | 152.5 | No hits found                                                              |
| 17562 | 25 | 1023 | 6  | 831  | 1885 | 8.5  | 66.9  | gij74763772 sp O44249.3 PRP1_MANSE proPO-p1                                |
| 17568 | 0  | 0    | 0  | 400  | 400  | 0.0  | 193.1 | No hits found                                                              |
| 17582 | 31 | 1551 | 4  | 544  | 2130 | 10.4 | 65.6  | No hits found                                                              |
| 17612 | 13 | 895  | 2  | 739  | 1649 | 14.3 | 178.4 | gij74763772 sp O44249.3 PRP1_MANSE proPO-p1                                |
| 17629 | 21 | 1086 | 4  | 677  | 1788 | 10.7 | 81.7  | gij74763772 sp O44249.3 PRP1_MANSE proPO-p1                                |
| 17650 | 12 | 668  | 2  | 451  | 1133 | 11.5 | 108.8 | No hits found                                                              |
| 17700 | 19 | 549  | 1  | 189  | 758  | 6.0  | 91.2  | gij217262 dbj BAA03124.1  lectin [Bombyx mori]                             |
| 17732 | 20 | 1241 | 3  | 447  | 1711 | 12.9 | 71.9  | gij162462371 ref NP_001104817.1  lectin precursor [Bombyx mori]            |
| 17751 | 0  | 24   | 1  | 269  | 294  | 5.0  | 129.8 | gij2149091 gb AAB58491.1  serpin-2 [Manduca sexta]                         |
| 17769 | 21 | 1312 | 2  | 476  | 1811 | 13.0 | 114.9 | gij162462371 ref NP_001104817.1  lectin precursor [Bombyx mori]            |
| 17829 | 12 | 612  | 0  | 397  | 1021 | 10.6 | 191.6 | No hits found                                                              |
| 17958 | 25 | 1323 | 3  | 940  | 2291 | 11.0 | 151.2 | gij75038472 sp Q25519.3 PRP2_MANSE proPO-p2                                |
| 18004 | 49 | 1944 | 9  | 1436 | 3438 | 8.2  | 77.0  | gij75038472 sp Q25519.3 PRP2_MANSE proPO-p2                                |
| 18032 | 22 | 1216 | 0  | 441  | 1679 | 11.5 | 212.9 | gij162462371 ref NP_001104817.1  lectin precursor [Bombyx mori]            |
| 18045 | 19 | 867  | 2  | 282  | 1170 | 9.5  | 68.1  | gij156545430 ref XP_001606650.1  ~ CG7002-PA [Nasonia vitripennis]         |
| 18065 | 21 | 905  | 4  | 712  | 1642 | 8.9  | 85.9  | gij74763772 sp O44249.3 PRP1_MANSE proPO-p1                                |
| 18067 | 18 | 987  | 2  | 352  | 1359 | 11.4 | 85.0  | gij162462371 ref NP_001104817.1  lectin precursor [Bombyx mori]            |
| 18073 | 8  | 500  | 0  | 217  | 725  | 13.0 | 104.7 | gij162462371 ref NP_001104817.1  lectin precursor [Bombyx mori]            |
| 18089 | 10 | 759  | 0  | 228  | 997  | 15.7 | 110.1 | gij162462371 ref NP_001104817.1  lectin precursor [Bombyx mori]            |
| 18097 | 22 | 960  | 0  | 348  | 1330 | 9.0  | 168.0 | gij162462371 ref NP_001104817.1  lectin precursor [Bombyx mori]            |
| 18235 | 22 | 992  | 2  | 328  | 1344 | 9.3  | 79.2  | No hits found                                                              |
| 18261 | 11 | 790  | 1  | 308  | 1110 | 14.9 | 148.7 | No hits found                                                              |
| 18284 | 19 | 1069 | 5  | 646  | 1739 | 11.7 | 62.4  | No hits found                                                              |
| 18286 | 29 | 1294 | 1  | 404  | 1728 | 9.2  | 195.0 | gij162462371 ref NP_001104817.1  lectin precursor [Bombyx mori]            |
| 18304 | 18 | 669  | 0  | 291  | 978  | 7.7  | 140.5 | No hits found                                                              |
| 18325 | 22 | 1278 | 2  | 470  | 1772 | 12.0 | 113.4 | No hits found                                                              |
| 18326 | 11 | 484  | 0  | 213  | 708  | 9.1  | 102.8 | gij162462371 ref NP_001104817.1  lectin precursor [Bombyx mori]            |
| 18418 | 3  | 308  | 1  | 181  | 493  | 21.3 | 87.4  | No hits found                                                              |
| 18463 | 24 | 1035 | 1  | 636  | 1696 | 8.9  | 307.0 | gij74763772 sp O44249.3 PRP1_MANSE proPO-p1                                |
| 18480 | 13 | 574  | 0  | 201  | 788  | 9.2  | 97.0  | No hits found                                                              |
| 18516 | 56 | 2042 | 7  | 1293 | 3398 | 7.6  | 89.2  | gij75038472 sp Q25519.3 PRP2_MANSE proPO-p2                                |
| 18551 | 16 | 928  | 2  | 283  | 1229 | 12.0 | 68.3  | gij910905448 ref XP_971239.1  ~ hemolectin CG7002-PA [Tribolium castaneum] |
| 18719 | 10 | 475  | 1  | 140  | 626  | 9.8  | 67.6  | gij162462371 ref NP_001104817.1  lectin precursor [Bombyx mori]            |
| 18721 | 15 | 456  | 0  | 212  | 683  | 6.3  | 102.3 | gij162462371 ref NP_001104817.1  lectin precursor [Bombyx mori]            |
| 18766 | 20 | 895  | 1  | 665  | 1581 | 9.3  | 321.0 | No hits found                                                              |
| 18794 | 15 | 527  | 0  | 284  | 826  | 7.3  | 137.1 | gij162462371 ref NP_001104817.1  lectin precursor [Bombyx mori]            |
| 18811 | 36 | 1830 | 11 | 1292 | 3169 | 10.5 | 56.7  | gij75038472 sp Q25519.3 PRP2_MANSE proPO-p2                                |
| 18816 | 9  | 851  | 1  | 259  | 1120 | 19.6 | 125.0 | No hits found                                                              |
| 18860 | 24 | 705  | 1  | 385  | 1115 | 6.1  | 185.8 | gij114050871 ref NP_001040411.1  carboxylesterase [Bombyx mori]            |
| 18887 | 20 | 1028 | 2  | 575  | 1625 | 10.7 | 138.8 | gij74763772 sp O44249.3 PRP1_MANSE proPO-p1                                |

\* RA and ARN are calculated using original read numbers as described in Section 2.3. Listed here are contigs with  $RA_{IH/IF} > 40$ ,  $RA_{CH/CF} > 40$ ,  $ARN_{IH} > 80$  when  $RN_{IF} = 0$ , or  $ARN_{CH} > 80$  when  $RN_{CF} = 0$ .  $RA_{IF/CF}$  and  $RA_{IH/CH}$  values are shown in red if they are greater than 40, whereas  $ARN_{CH}$  and  $ARN_{IH}$  values are shown in blue if they are higher than 80. In the columns of RA or ARN, cells shaded green and orange represent down- and up-regulated gene expression, respectively.

**Table S4. A complete list of 250 FB CIFH contigs with RA<sub>CF/CH</sub> or IF/IH >100 (or ARN<sub>CF</sub> or IF >200)**

| CIFH contig # | Original read # |    |      |    |       | RA or ARN |        | BLAST results                                                                                              |
|---------------|-----------------|----|------|----|-------|-----------|--------|------------------------------------------------------------------------------------------------------------|
|               | CF              | CH | IF   | IH | Total | CF/CH     | IF/IH  |                                                                                                            |
| 00051         | 291             | 1  | 329  | 0  | 621   | 1403.9    | 681.6  | gi 183979376 dbj BAG30740.1  muscle myosin heavy chain [Papilio xuthus]                                    |
| 00153         | 944             | 1  | 1116 | 0  | 2061  | 4554.1    | 2312.0 | gi 2498144 sp Q25490.1 APLP_MANSE apolipoproteins containing apoLp-2 and -1                                |
| 00194         | 37              | 0  | 81   | 1  | 119   | 178.5     | 167.8  | gi 48476133 gb AAT44358.1  calcium-activated potassium channel $\alpha$ subunit [Manduca sexta]            |
| 00285         | 185             | 19 | 424  | 4  | 632   | 47.0      | 219.6  | gi 73921301 gb AAG42021.2 AF327882_1 JHE precursor [Manduca sexta]                                         |
| 00409         | 168             | 0  | 216  | 0  | 384   | 810.5     | 447.5  | gi 110750043 ref XP_394261.3  plexin A CG11081-PA, isoform A [Apis mellifera]                              |
| 00414         | 58              | 1  | 50   | 0  | 109   | 279.8     | 103.6  | gi 195382713 ref XP_002050074.1  GJ21937 [Drosophila virilis]                                              |
| 00423         | 149             | 0  | 220  | 0  | 369   | 718.8     | 455.8  | gi 158295580 ref XP_316291.4  AGAP006225-PA [Anopheles gambiae]                                            |
| 00465         | 134             | 1  | 230  | 0  | 365   | 646.4     | 476.5  | gi 149755131 ref XP_001491560.1  ~hemicentin 1 [Equus caballus]                                            |
| 00535         | 67              | 1  | 100  | 0  | 168   | 323.2     | 207.2  | gi 242015135 ref XP_002428229.1  thrombospondin-3 precursor [Pediculus humanus corporis]                   |
| 00575         | 3               | 0  | 259  | 5  | 267   | 14.5      | 107.3  | gi 154240658 dbj BAF74637.1  peptidoglycan recognition protein-D [Samia cynthiaricini]                     |
| 00609         | 324             | 0  | 762  | 0  | 1086  | 1563.1    | 1578.6 | gi 225542786 gb ACN91276.1  dentin sialoprotein precursor [Bos taurus]                                     |
| 00737         | 2               | 4  | 131  | 2  | 139   | 2.4       | 135.7  | gi 198466442 ref XP_002135189.1  GA23919 [Drosophila pseudoobscura]                                        |
| 00748         | 131             | 4  | 118  | 2  | 255   | 158.0     | 122.2  | gi 29346557 ref NP_810060.1  glycine dehydrogenase [Bacteroides thetaiotaomicron]                          |
| 00766         | 45              | 0  | 74   | 1  | 120   | 217.1     | 153.3  | gi 158293377 ref XP_314728.3  AGAP008632-PA [Anopheles gambiae]                                            |
| 00773         | 49              | 12 | 93   | 1  | 155   | 19.7      | 192.7  | gi 157103945 ref XP_001648193.1  dihydropyrimidine dehydrogenase [Aedes aegypti]                           |
| 00785         | 120             | 2  | 139  | 2  | 263   | 289.5     | 144.0  | gi 193795848 gb ACF21977.1  paramyosin [Bombyx mandarina]                                                  |
| 00859         | 113             | 4  | 497  | 1  | 615   | 136.3     | 1029.6 | gi 73921301 gb AAG42021.2 AF327882_1 JHE precursor [Manduca sexta]                                         |
| 00884         | 39              | 1  | 23   | 0  | 63    | 188.1     | 47.6   | gi 156553304 ref XP_001599652.1  ~ GA21752-PA [Nasonia vitripennis]                                        |
| 00960         | 52              | 2  | 99   | 1  | 154   | 125.4     | 205.1  | gi 157107996 ref XP_001650030.1  sarcosine dehydrogenase [Aedes aegypti]                                   |
| 01095         | 64              | 0  | 99   | 1  | 164   | 308.8     | 205.1  | gi 169639235 gb ACA60733.1  venom acid phosphatase [Pteromalus puparum]                                    |
| 01097         | 134             | 2  | 436  | 5  | 577   | 323.2     | 180.7  | gi 55139125 gb AAV41236.1  immunlectin-3 [Manduca sexta]                                                   |
| 01127         | 41              | 1  | 52   | 1  | 95    | 197.8     | 107.7  | gi 189491898 gb ACE00761.1  adipokinetic hormone receptor [Manduca sexta]                                  |
| 01454         | 599             | 3  | 1337 | 3  | 1942  | 963.2     | 923.3  | gi 91082539 ref XP_973726.1  inter- $\alpha$ (globulin) inhibitor H4 (kallikrein-sensitive) [T. castaneum] |
| 01480         | 211             | 0  | 729  | 0  | 940   | 1017.9    | 1510.3 | gi 183979392 dbj BAG30748.1  hypothetical protein [Papilio xuthus]                                         |
| 01601         | 60              | 1  | 79   | 0  | 140   | 289.5     | 163.7  | gi 27005801 gb EFA02249.1  hypothetical TeasGA2_TC007912 [Tribolium castaneum]                             |
| 01714         | 3               | 2  | 90   | 1  | 96    | 7.2       | 186.5  | No hits found                                                                                              |
| 01742         | 65              | 0  | 75   | 0  | 140   | 313.6     | 155.4  | gi 283100192 gb ADB08386.1  sugar transporter 4 [Bombyx mori]                                              |
| 01743         | 27              | 0  | 112  | 0  | 139   | 130.3     | 232.0  | gi 134252572 gb ABO65045.1  $\beta$ -hexosaminidase [Ostrinia furnacalis]                                  |
| 01870         | 184             | 0  | 323  | 0  | 507   | 887.7     | 699.2  | gi 242010783 ref XP_002426138.1  conserved hypothetical protein [Pediculus humanus corporis]               |
| 01892         | 82              | 0  | 108  | 0  | 190   | 395.6     | 223.7  | gi 158289807 ref XP_311448.4  AGAP1010734-PA [Anopheles gambiae]                                           |
| 01915         | 85              | 2  | 275  | 0  | 362   | 205.0     | 569.7  | gi 110757936 ref XP_623940.2  ~ peroxidase precursor [Apis mellifera]                                      |
| 01956         | 127             | 0  | 99   | 0  | 226   | 612.7     | 205.1  | gi 156551746 ref XP_001602035.1  ENSANGP0000015052 [Nasonia vitripennis]                                   |
| 01972         | 112             | 0  | 424  | 0  | 536   | 540.3     | 878.4  | gi 1362206 sp P22297.1 TRF_MANSE transferrin precursor                                                     |
| 02101         | 51              | 0  | 75   | 0  | 126   | 246.0     | 155.4  | gi 186909546 gb ACC94296.1  glucose oxidase-like enzyme [Helicoverpa armigera]                             |
| 02104         | 59              | 1  | 67   | 1  | 128   | 284.6     | 138.8  | gi 91079628 ref XP_967731.1  ~AGAP002355-PA [Tribolium castaneum]                                          |
| 02137         | 101             | 0  | 24   | 0  | 125   | 487.2     | 49.7   | gi 91084191 ref XP_967340.1  ~AGAP002557-PA [Tribolium castaneum]                                          |
| 02144         | 82              | 0  | 132  | 3  | 217   | 395.6     | 91.2   | gi 62002223 gb AAx58711.1  pheromone-degrading enzyme 1 [Antheraea polyphemus]                             |
| 02166         | 60              | 0  | 57   | 0  | 117   | 289.5     | 118.1  | gi 193876254 gb ACF24761.1  lipid storage droplet protein 1 [Manduca sexta]                                |
| 02184         | 53              | 2  | 111  | 1  | 167   | 127.8     | 230.0  | gi 226342886 ref NP_001139705.1  serpin 13 [Bombyx mori]                                                   |
| 02219         | 454             | 3  | 971  | 3  | 1431  | 730.1     | 670.5  | gi 219815604 gb ACL36977.1  putative ecdysone oxidase [Helicoverpa zea]                                    |
| 02329         | 143             | 0  | 411  | 0  | 554   | 689.9     | 851.5  | gi 112984054 ref NP_001037422.1  yellow 1 [Bombyx mori]                                                    |
| 02337         | 65              | 2  | 124  | 6  | 197   | 156.8     | 42.8   | gi 91079867 ref XP_967070.1  ~AGAP005945-PB [Tribolium castaneum]                                          |
| 02340         | 50              | 0  | 60   | 0  | 110   | 241.2     | 124.3  | No hits found                                                                                              |
| 02361         | 7               | 4  | 70   | 1  | 82    | 8.4       | 145.0  | gi 56418425 gb AAV91020.1  hemolymph proteinase 22 [Manduca sexta]                                         |
| 02393         | 45              | 0  | 77   | 5  | 127   | 217.1     | 31.9   | gi 156545523 ref XP_001607196.1  Dihydroxyacetone kinase2 homolog (yeast) [Nasonia vitripennis]            |
| 02394         | 28              | 1  | 23   | 0  | 52    | 135.1     | 47.6   | gi 91077746 ref XP_966706.1  conserved hypotheticalprotein [Tribolium castaneum]                           |
| 02405         | 124             | 0  | 125  | 1  | 250   | 598.2     | 259.0  | gi 2498144 sp Q25490.1 APLP_MANSE apolipoproteins, containing apoLp-2 and 1                                |
| 02406         | 263             | 1  | 401  | 0  | 665   | 1268.8    | 830.8  | gi 2498144 sp Q25490.1 APLP_MANSE apolipoproteins, containing apoLp-2 and 1                                |
| 02409         | 113             | 0  | 187  | 0  | 300   | 545.1     | 387.4  | gi 109502352 gb ABE01157.2  carboxylesterase [Spodoptera litura]                                           |
| 02482         | 63              | 0  | 85   | 1  | 149   | 303.9     | 176.1  | gi 66519258 ref XP_625210.1  ~CG6188-PA [Apis mellifera]                                                   |
| 02562         | 138             | 1  | 546  | 0  | 685   | 665.7     | 1131.1 | No hits found                                                                                              |
| 02609         | 97              | 0  | 146  | 2  | 245   | 468.0     | 151.2  | gi 156968285 gb ABU98614.1  alpha-amylase [Helicoverpa armigera]                                           |
| 02638         | 120             | 0  | 138  | 0  | 258   | 578.9     | 285.9  | gi 41016826 sp Q27772.3 C1TC_SPOFR C-1-THF synthase, cytoplasmic                                           |
| 02651         | 24              | 0  | 124  | 0  | 148   | 115.8     | 256.9  | gi 5326830 gb AAD42058.1 AF122899_1 plasmotocyte-spreading peptide precursor [Manduca sexta]               |
| 02669         | 2               | 0  | 158  | 0  | 160   | 9.6       | 327.3  | No hits found                                                                                              |
| 02800         | 28              | 0  | 97   | 0  | 125   | 135.1     | 201.0  | gi 260765449 gb ACX49762.1  $\beta$ -fructofuranosidase 1 [Manduca sexta]                                  |
| 02837         | 148             | 0  | 319  | 0  | 467   | 714.0     | 660.9  | No hits found                                                                                              |
| 02847         | 33              | 0  | 103  | 0  | 136   | 159.2     | 213.4  | gi 114051702 ref NP_001040423.1  zinc-containing alcohol dehydrogenase [Bombyx mori]                       |
| 02931         | 84              | 0  | 257  | 0  | 341   | 405.2     | 532.4  | gi 1658003 gb AAB18243.1  microsomal epoxide hydrolase [Trichoplusia ni]                                   |
| 02947         | 518             | 21 | 981  | 56 | 1576  | 119.0     | 36.3   | gi 259493819 gb ACW82749.1  hemocyte aggregation inhibitor protein precursor [Manduca sexta]               |
| 02979         | 49              | 0  | 92   | 4  | 145   | 236.4     | 47.6   | gi 52782757 sp Q9NJ98.1 BGRP1_MANSE $\beta$ -1,3-glucan recognitionprotein 1 [BGRP-1                       |
| 02985         | 3               | 0  | 158  | 0  | 161   | 14.5      | 327.3  | gi 56418466 gb AAV91027.1  serine proteinase-like protein 4 [Manduca sexta]                                |
| 03185         | 106             | 0  | 234  | 10 | 350   | 511.4     | 48.5   | gi 157117489 ref XP_001658792.1  3-hydroxyacyl-coa dehydrogenase [Aedes aegypti]                           |
| 03224         | 98              | 0  | 477  | 0  | 575   | 472.8     | 988.2  | gi 226342906 ref NP_001139715.1  serpin 22 [Bombyx mori]                                                   |
| 03226         | 222             | 0  | 663  | 0  | 885   | 1071.0    | 1373.5 | gi 153791757 ref NP_001093275.1  myo-inositol oxygenase [Bombyx mori]                                      |
| 03395         | 22              | 1  | 24   | 0  | 47    | 106.1     | 49.7   | gi 157908523 dbj BAF81491.1  juvenile hormone epoxide hydrolase [Bombyx mori]                              |
| 03415         | 190             | 0  | 216  | 1  | 407   | 916.6     | 447.5  | gi 2708688 gb AAB92583.1  acyl-CoA delta-9 desaturase [Trichoplusia ni]                                    |
| 03434         | 1               | 0  | 387  | 0  | 388   | 4.8       | 801.7  | gi 189234566 ref XP_001815977.1  Kaz1-ORFB CG1220-PE [Tribolium castaneum]                                 |
| 03454         | 28              | 0  | 102  | 0  | 130   | 135.1     | 211.3  | gi 6560669 gb AAF16712.1 AF117590_1 unknown [Manduca sexta]                                                |
| 03483         | 280             | 0  | 374  | 0  | 654   | 1350.8    | 774.8  | gi 283558277 gb ADB27116.1  aliphatic nitrilase [Bombyx mori]                                              |
| 03712         | 49              | 2  | 157  | 5  | 213   | 118.2     | 65.1   | gi 170779021 gb ACB36909.1  glutathione S-transferase theta [Antheraea pernyi]                             |
| 03737         | 167             | 1  | 197  | 0  | 365   | 805.6     | 408.1  | gi 56462300 gb AAV91433.1  putative serine protease-like protein 2 [Lonomia obliqua]                       |
| 03748         | 60              | 0  | 45   | 0  | 105   | 289.5     | 93.2   | gi 2498144 sp Q25490.1 APLP_MANSE apolipoproteins, containing apoLp-2 and apoLp-1                          |
| 03776         | 109             | 5  | 579  | 31 | 724   | 105.2     | 38.7   | gi 112983872 ref NP_001036857.1  serpin-like protein (SEP-LP) [Bombyx mori]                                |
| 04012         | 122             | 2  | 528  | 10 | 662   | 294.3     | 109.4  | gi 27733411 gb AAO21503.1 AF413062_1 leureptin, LPS binding [Manduca sexta]                                |
| 04378         | 4               | 0  | 62   | 1  | 67    | 19.3      | 128.4  | No hits found                                                                                              |
| 04388         | 103             | 0  | 172  | 0  | 275   | 496.9     | 356.3  | gi 1658003 gb AAB18243.1  microsomal epoxide hydrolase [Trichoplusia ni]                                   |
| 04413         | 69              | 1  | 133  | 1  | 204   | 332.9     | 275.5  | gi 194743582 ref XP_001954279.1  GF18195 [Drosophila ananassae]                                            |
| 04424         | 72              | 0  | 64   | 0  | 136   | 347.3     | 132.6  | gi 114052020 ref NP_001040445.1  tropomyosin 1 [Bombyx mori]                                               |
| 04430         | 74              | 0  | 68   | 0  | 142   | 357.0     | 140.9  | gi 114052573 ref NP_001040481.1  phosphoribosyl pyrophosphate synthetase [Bombyx mori]                     |
| 04498         | 46              | 0  | 115  | 0  | 161   | 221.9     | 238.2  | gi 90025232 gb ABD85119.1  juvenile hormone epoxide hydrolase [Spodoptera exigua]                          |
| 04504         | 53              | 0  | 135  | 0  | 188   | 255.7     | 279.7  | gi 7239259 gb AAF43151.1 AF226857_1 hemolymph JHBP precursor [Manduca sexta]                               |
| 04510         | 135             | 2  | 182  | 0  | 319   | 325.6     | 377.0  | gi 2498144 sp Q25490.1 APLP_MANSE apolipoproteins, containing apoLp-2 and apoLp-1                          |
| 04720         | 26              | 1  | 1025 | 0  | 1052  | 125.4     | 2123.5 | No hits found                                                                                              |
| 04722         | 408             | 0  | 681  | 0  | 1089  | 1968.3    | 1410.8 | gi 116791778 gb ABK26104.1  unknown [Picea sitchensis]                                                     |
| 04781         | 56              | 0  | 237  | 0  | 293   | 270.2     | 491.0  | gi 118359591 ref XP_001013035.1  PHD-finger family protein [Tetrahymena thermophila]                       |
| 04786         | 61              | 0  | 62   | 0  | 123   | 294.3     | 128.4  | gi 219686082 emb CAW30924.1  putative aldo-ketose reductase 1 [Papilio dardanus]                           |
| 04791         | 144             | 0  | 200  | 0  | 344   | 694.7     | 414.3  | gi 116788175 gb ABK24783.1  unknown [Picea sitchensis]                                                     |



|       |      |    |      |    |      |        |        |                                                                                                     |
|-------|------|----|------|----|------|--------|--------|-----------------------------------------------------------------------------------------------------|
| 04806 | 518  | 1  | 372  | 0  | 891  | 2499.0 | 770.7  | gi 157122933 ref XP_001659963.1  actin [Aedes aegypti]                                              |
| 04808 | 0    | 0  | 426  | 2  | 428  | 0.0    | 441.3  | gi 237861314 gb AAV41237.2  immunlectin-4 [Manduca sexta]                                           |
| 04830 | 12   | 0  | 124  | 0  | 136  | 57.9   | 256.9  | gi 169646838 ref NP_001112375.1  heat shock protein 25.4 [Bombyx mori]                              |
| 04887 | 10   | 0  | 109  | 0  | 119  | 48.2   | 225.8  | gi 169646838 ref NP_001112375.1  heat shock protein 25.4 [Bombyx mori]                              |
| 04994 | 170  | 0  | 180  | 0  | 350  | 820.1  | 372.9  | gi 116791778 gb ABK26104.1  unknown [Picea sitchensis]                                              |
| 05038 | 41   | 0  | 105  | 1  | 147  | 197.8  | 217.5  | gi 110759694 ref XP_394781.3  ~rTS beta protein [Apis mellifera]                                    |
| 05136 | 1074 | 11 | 1041 | 37 | 2163 | 471.0  | 58.3   | gi 114051966 ref NP_001040198.1  mitochondrial aldehyde dehydrogenase [Bombyx mori]                 |
| 05324 | 68   | 0  | 88   | 0  | 156  | 328.0  | 182.3  | gi 225346695 gb ACN86370.1  tropoin 1 transcript variant C [Bombyx mandarina]                       |
| 05348 | 50   | 0  | 67   | 0  | 117  | 241.2  | 138.8  | gi 189234391 ref XP_974849.2  ~GA16498-PA [Tribolium castaneum]                                     |
| 05417 | 73   | 0  | 198  | 0  | 271  | 352.2  | 410.2  | gi 260907784 gb ACX53694.1  alcohol dehydrogenase [Heliothis virescens]                             |
| 05461 | 43   | 0  | 35   | 0  | 78   | 207.4  | 72.5   | gi 260907784 gb ACX53694.1  alcohol dehydrogenase [Heliothis virescens]                             |
| 05532 | 0    | 0  | 110  | 0  | 110  | 0.0    | 227.9  | No hits found                                                                                       |
| 05717 | 37   | 2  | 522  | 6  | 567  | 89.2   | 180.2  | gi 169646838 ref NP_001112375.1  heat shock protein 25.4 [Bombyx mori]                              |
| 05735 | 13   | 0  | 102  | 0  | 115  | 62.7   | 211.3  | No hits found                                                                                       |
| 05832 | 60   | 0  | 70   | 0  | 130  | 289.5  | 145.0  | gi 110759694 ref XP_394781.3  ~rTS beta protein [Apis mellifera]                                    |
| 05984 | 89   | 0  | 97   | 0  | 186  | 429.4  | 201.0  | gi 56462260 gb AAV91413.1  myosin 3 light chain [Lonomia obliqua]                                   |
| 06040 | 21   | 1  | 21   | 0  | 43   | 101.3  | 43.5   | No hits found                                                                                       |
| 06175 | 11   | 0  | 52   | 1  | 64   | 53.1   | 107.7  | gi 170070451 ref XP_001869584.1  conserved hypothetical protein [Culex quinquefasciatus]            |
| 06215 | 29   | 1  | 108  | 8  | 146  | 139.9  | 28.0   | gi 112983872 ref NP_001036857.1  serpin-like protein (SEP-LP) [Bombyx mori]                         |
| 06227 | 251  | 1  | 715  | 0  | 967  | 1210.9 | 1481.3 | gi 124527 sp Q00630.1 ICYB_MANSE insecticyanin-B (INS-b), blue biliprotein                          |
| 06251 | 66   | 2  | 57   | 7  | 132  | 159.2  | 16.9   | gi 158289206 ref XP_310956.4  AGAP000179-PA [Anopheles gambiae]                                     |
| 06394 | 51   | 0  | 228  | 0  | 279  | 246.0  | 472.3  | gi 110611262 gb ABG77980.1  Ala-glyoxylate transaminase 1 [Glossinamorsitans morsitans]             |
| 06531 | 45   | 2  | 199  | 11 | 257  | 108.5  | 37.5   | gi 112983872 ref NP_001036857.1  serpin-like protein (SEP-LP) [Bombyx mori]                         |
| 06588 | 60   | 0  | 75   | 0  | 135  | 289.5  | 155.4  | gi 56462256 gb AAV91411.1  myosin 1 light chain [Lonomia obliqua]                                   |
| 06597 | 60   | 0  | 200  | 0  | 260  | 289.5  | 414.3  | gi 56462320 gb AAV91443.1  putative secreted peptide 30 [Lonomia obliqua]                           |
| 06611 | 22   | 1  | 23   | 5  | 51   | 106.1  | 9.5    | No hits found                                                                                       |
| 06732 | 115  | 1  | 244  | 0  | 360  | 554.8  | 505.5  | gi 25090512 sp Q25513.1 HGLY_MANSE 27 kDa hemolymph glycoprotein                                    |
| 06789 | 111  | 0  | 416  | 0  | 527  | 535.5  | 861.8  | gi 156968291 gb ABU98617.1  unknown [Helicoverpa armigera]                                          |
| 06831 | 88   | 0  | 76   | 0  | 164  | 424.5  | 157.4  | gi 2498144 sp Q25490.1 APLP_MANSE apolipophorins, containing apoLp-2 and -1                         |
| 06834 | 142  | 0  | 231  | 0  | 373  | 685.0  | 478.6  | gi 2498144 sp Q25490.1 APLP_MANSE apolipophorins, containing apoLp-2 and -1                         |
| 06876 | 48   | 0  | 44   | 0  | 92   | 231.6  | 91.2   | gi 156968291 gb ABU98617.1  unknown [Helicoverpa armigera]                                          |
| 06975 | 78   | 1  | 166  | 2  | 247  | 376.3  | 172.0  | gi 189237651 ref XP_001813448.1  N-acetyl neuraminylase [Tribolium castaneum]                       |
| 07090 | 62   | 0  | 169  | 0  | 231  | 299.1  | 350.1  | No hits found                                                                                       |
| 07116 | 1    | 4  | 902  | 3  | 910  | 1.2    | 622.9  | gi 171262319 gb ACB45566.1  lebecin-like protein [Antheraea pernyi]                                 |
| 07389 | 133  | 0  | 511  | 0  | 644  | 641.6  | 1058.6 | gi 260907784 gb ACX53694.1  alcohol dehydrogenase [Heliothis virescens]                             |
| 07432 | 24   | 0  | 173  | 0  | 197  | 115.8  | 358.4  | gi 260907784 gb ACX53694.1  alcohol dehydrogenase [Heliothis virescens]                             |
| 07536 | 7    | 0  | 383  | 2  | 392  | 33.8   | 396.7  | No hits found                                                                                       |
| 07565 | 24   | 1  | 14   | 0  | 39   | 115.8  | 29.0   | gi 7862150 gb AAF70499.1 AF255341_1 3-dehydroecdysone 3 $\alpha$ -reductase [Spodoptera littoralis] |
| 07608 | 78   | 0  | 27   | 0  | 105  | 376.3  | 55.9   | gi 159526 gb AAA29320.1  Met-rich storage protein 1 [Manduca sexta]                                 |
| 07629 | 65   | 0  | 82   | 0  | 147  | 313.6  | 169.9  | gi 77415676 emb CAJ01507.1  hypothetical protein [Manduca sexta]                                    |
| 07639 | 651  | 0  | 1237 | 14 | 1902 | 3140.6 | 183.0  | gi 134436 sp P14754.1 SERA_MANSE alaserpin serpin-1                                                 |
| 07658 | 121  | 0  | 68   | 0  | 189  | 583.7  | 140.9  | gi 41016826 sp Q27772.3 CITC_SPOFR C-1-tetrahydrofolate synthase cytoplasmic                        |
| 07671 | 227  | 3  | 450  | 3  | 683  | 365.0  | 310.8  | gi 195164814 ref XP_002023241.1  GL21066 [Drosophila persimilis]                                    |
| 07770 | 79   | 0  | 116  | 0  | 195  | 381.1  | 240.3  | gi 2498144 sp Q25490.1 APLP_MANSE apolipophorins containing apoLp-2 and -1                          |
| 07975 | 121  | 1  | 1930 | 0  | 2052 | 583.7  | 3998.4 | gi 159526 gb AAA29320.1  Met-rich storage protein 1 [Manduca sexta]                                 |
| 08076 | 18   | 1  | 53   | 1  | 73   | 86.8   | 109.8  | gi 226342878 ref NP_001139701.1  serpin 7 [Bombyx mori]                                             |
| 08141 | 84   | 0  | 845  | 0  | 929  | 405.2  | 1750.6 | gi 159526 gb AAA29320.1  Met-rich storage protein 1 [Manduca sexta]                                 |
| 08224 | 1932 | 1  | 2695 | 0  | 4628 | 9320.4 | 5583.2 | gi 1168527 sp P14297.2 ARYB_MANSE arylphorin subunit $\beta$ precursor                              |
| 08453 | 45   | 1  | 199  | 1  | 246  | 217.1  | 412.3  | gi 2773341 gb AAO21503.1 AF413062_1 leureptin, LPS binding [Manduca sexta]                          |
| 08467 | 0    | 0  | 113  | 0  | 113  | 0.0    | 234.1  | gi 112983866 ref NP_001036858.1  T7 lysozyme-like protein 1 [Bombyx mori]                           |
| 08500 | 138  | 0  | 407  | 0  | 545  | 665.7  | 843.2  | gi 156406857 ref XP_001641261.1  predicted protein [Nematostella vectensis]                         |
| 08721 | 85   | 1  | 192  | 1  | 279  | 410.1  | 397.8  | No hits found                                                                                       |
| 08821 | 246  | 0  | 436  | 2  | 684  | 1186.8 | 451.6  | gi 112983550 ref NP_001036879.1  fibrillin-like protein [Bombyx mori]                               |
| 08845 | 27   | 0  | 130  | 0  | 157  | 130.3  | 269.3  | gi 195029763 ref XP_001987741.1  GH19797 [Drosophila grimshawi]                                     |
| 08854 | 220  | 3  | 3742 | 0  | 3965 | 353.8  | 7752.3 | gi 5869985 emb CAB55603.1  moderately Met-rich storage protein [Spodoptera litura]                  |
| 09928 | 30   | 0  | 106  | 0  | 136  | 144.7  | 219.6  | gi 242090851 ref XP_002441258.1  hypothetical SORBIDRAFT_09g023310 [Sorghum bicolor]                |
| 09986 | 23   | 1  | 31   | 3  | 58   | 111.0  | 21.4   | No hits found                                                                                       |
| 10071 | 11   | 1  | 1117 | 0  | 1129 | 53.1   | 2314.1 | gi 228382 prf I1803340A Met-rich storage protein SPIA                                               |
| 10244 | 78   | 0  | 108  | 0  | 186  | 376.3  | 223.7  | No hits found                                                                                       |
| 10326 | 284  | 4  | 299  | 11 | 598  | 342.5  | 56.3   | gi 56462160 gb AAV91363.1  hypothetical protein 10 [Lonomia obliqua]                                |
| 10340 | 21   | 5  | 62   | 1  | 89   | 20.3   | 128.4  | No hits found                                                                                       |
| 10382 | 76   | 0  | 744  | 0  | 820  | 366.6  | 1541.3 | gi 136206 sp P22297.1 TRF_MANSE transferrin precursor                                               |
| 10791 | 1    | 0  | 1081 | 1  | 1083 | 4.8    | 2239.5 | gi 4262357 gb AAD14591.1  scolexin A [Manduca sexta]                                                |
| 10792 | 0    | 0  | 333  | 0  | 333  | 0.0    | 689.9  | gi 4262357 gb AAD14591.1  scolexin A [Manduca sexta]                                                |
| 10853 | 0    | 0  | 113  | 1  | 114  | 0.0    | 234.1  | gi 171262319 gb ACB45566.1  lebecin-like protein [Antheraea pernyi]                                 |
| 11027 | 59   | 0  | 694  | 0  | 753  | 284.6  | 1437.8 | gi 136206 sp P22297.1 TRF_MANSE transferrin precursor                                               |
| 11039 | 1670 | 0  | 2578 | 0  | 4248 | 8056.5 | 5340.8 | gi 114240 sp P14296.1 ARYA_MANSE arylphorin subunit $\alpha$ precursor                              |
| 11830 | 26   | 1  | 33   | 0  | 60   | 125.4  | 68.4   | gi 260780799 ref XP_002585527.1  hypothetical BRAFLDRAFT_89257 [B. floridae]                        |
| 11922 | 354  | 6  | 420  | 2  | 782  | 284.6  | 435.1  | gi 114058 sp P13276.1 APL3_MANSE apolipophorin-3 (apoLp-III)                                        |
| 12005 | 154  | 0  | 2177 | 0  | 2331 | 742.9  | 4510.1 | gi 2625150 gb AAB86646.1  moderately Met-rich hexamerin precursor [Hyalophora cecropia]             |
| 12151 | 0    | 0  | 153  | 0  | 153  | 0.0    | 317.0  | gi 116084 sp P14665.1 CECS_MANSE bactericidin B-5P, cecropin-like precursor                         |
| 12749 | 135  | 0  | 1462 | 0  | 1597 | 651.3  | 3028.8 | gi 159530 gb AAA29322.1  Met-rich storage protein 3 [Manduca sexta]                                 |
| 13093 | 547  | 6  | 632  | 1  | 1186 | 439.8  | 1309.3 | gi 114058 sp P13276.1 APL3_MANSE apolipophorin-3 apoLp-III precursor                                |
| 13238 | 3    | 1  | 524  | 0  | 528  | 14.5   | 1085.6 | No hits found                                                                                       |
| 13302 | 112  | 2  | 144  | 0  | 258  | 270.2  | 298.3  | No hits found                                                                                       |
| 13563 | 0    | 0  | 657  | 0  | 657  | 0.0    | 1361.1 | gi 110347786 gb ABG72695.1  attacin-like protein [Antheraea mylitta]                                |
| 13916 | 1    | 0  | 741  | 0  | 742  | 4.8    | 1535.1 | gi 219958086 gb ACL68097.1  lebecin-related protein precursor [Manduca sexta]                       |
| 13994 | 57   | 0  | 62   | 0  | 119  | 275.0  | 128.4  | gi 112983654 ref NP_001036872.1  bombyrin [Bombyx mori]                                             |
| 14087 | 139  | 0  | 153  | 0  | 292  | 670.6  | 317.0  | gi 2498144 sp Q25490.1 APLP_MANSE apolipophorins containing apoLp-2 and -1                          |
| 14173 | 45   | 0  | 32   | 0  | 77   | 217.1  | 66.3   | gi 153792114 ref NP_001093267.1  phosphatidylethanolamine binding protein [Bombyx mori]             |
| 14375 | 64   | 0  | 58   | 0  | 122  | 308.8  | 120.2  | gi 400673 sp P31420 OMB_MANSE ommochrome-binding protein precursor (OBP, YCP)                       |
| 14380 | 0    | 0  | 106  | 0  | 106  | 0.0    | 219.6  | gi 67906420 gb AAV82587.1  attacin-1 [Manduca sexta]                                                |
| 14528 | 29   | 2  | 62   | 1  | 94   | 70.0   | 128.4  | gi 226342878 ref NP_001139701.1  serpin 7 [Bombyx mori]                                             |
| 14589 | 95   | 0  | 118  | 0  | 213  | 458.3  | 244.5  | gi 2498144 sp Q25490.1 APLP_MANSE apolipophorins containing apoLp-2 and -1                          |
| 14637 | 28   | 1  | 46   | 0  | 75   | 135.1  | 95.3   | gi 189237651 ref XP_001813448.1  N-acetyl neuraminylase [Tribolium castaneum]                       |
| 14641 | 0    | 0  | 157  | 0  | 157  | 0.0    | 325.3  | gi 67906420 gb AAV82587.1  attacin-1 [Manduca sexta]                                                |
| 14659 | 202  | 0  | 374  | 0  | 576  | 974.5  | 774.8  | gi 400673 sp P31420 OMB_MANSE ommochrome-binding protein precursor (OBP, YCP)                       |
| 14688 | 70   | 2  | 1129 | 0  | 1201 | 168.8  | 2338.9 | gi 159526 gb AAA29320.1  Met-rich storage protein 1 [Manduca sexta]                                 |
| 14700 | 0    | 0  | 183  | 2  | 185  | 0.0    | 189.6  | gi 260765453 gb ACX49764.1  peptidoglycan recognition protein 2 [Manduca sexta]                     |
| 14732 | 43   | 0  | 44   | 0  | 87   | 207.4  | 91.2   | No hits found                                                                                       |
| 14752 | 0    | 0  | 118  | 2  | 120  | 0.0    | 122.2  | gi 260765453 gb ACX49764.1  peptidoglycan recognition protein 2 [Manduca sexta]                     |
| 14937 | 13   | 0  | 164  | 0  | 177  | 62.7   | 339.8  | gi 136206 sp P22297.1 TRF_MANSE transferrin precursor                                               |
| 15089 | 271  | 0  | 194  | 0  | 465  | 1307.4 | 401.9  | gi 158293921 ref XP_315269.4  AGAP011516-PA [Anopheles gambiae]                                     |



|       |      |   |      |   |      |         |        |                                                                                                |
|-------|------|---|------|---|------|---------|--------|------------------------------------------------------------------------------------------------|
| 15324 | 82   | 2 | 1492 | 0 | 1576 | 197.8   | 3091.0 | gi 5869985 emb CAB55603.1  moderately Met-rich storage protein [Spodoptera litura]             |
| 15475 | 9    | 0 | 110  | 0 | 119  | 43.4    | 227.9  | No hits found                                                                                  |
| 15524 | 43   | 0 | 165  | 0 | 208  | 207.4   | 341.8  | No hits found                                                                                  |
| 15639 | 10   | 0 | 109  | 0 | 119  | 48.2    | 225.8  | gi 148298818 ref NP_001091784.1  multi-binding protein [Bombyx mori]                           |
| 15796 | 42   | 0 | 46   | 1 | 89   | 202.6   | 95.3   | gi 91079867 ref XP_967070.1  ~AGAP005945-PB [Tribolium castaneum]                              |
| 15850 | 43   | 0 | 134  | 0 | 177  | 207.4   | 277.6  | No hits found                                                                                  |
| 15852 | 0    | 0 | 134  | 0 | 134  | 0.0     | 277.6  | No hits found                                                                                  |
| 15891 | 160  | 0 | 379  | 4 | 543  | 771.9   | 196.3  | gi 134433 sp P14754.1 SERA_MANSE alaserpin serpin-1                                            |
| 16000 | 61   | 0 | 138  | 0 | 199  | 294.3   | 285.9  | gi 109458629 ref XP_001073545.1 hypothetical protein [Rattus norvegicus]                       |
| 16150 | 0    | 1 | 145  | 3 | 149  | 0.0     | 100.1  | gi 67906420 gb AAY82587.1  attacin-1 [Manduca sexta]                                           |
| 16171 | 3015 | 3 | 4190 | 0 | 7208 | 4848.4  | 8680.4 | gi 114240 sp P14296.1 ARYA_MANSE arylphorin subunit $\alpha$ precursor                         |
| 16222 | 434  | 1 | 993  | 0 | 1428 | 2093.7  | 2057.2 | No hits found                                                                                  |
| 16223 | 22   | 1 | 47   | 2 | 72   | 106.1   | 48.7   | gi 242003442 ref XP_002422733.1  bifunctional purine biosynthesis protein [Pediculus corporis] |
| 16281 | 266  | 0 | 405  | 0 | 671  | 1283.2  | 839.0  | gi 134103857 gb ABO60878.1  cationic peptide CP8 precursor [Manduca sexta]                     |
| 16383 | 0    | 0 | 98   | 0 | 98   | 0.0     | 203.0  | No hits found                                                                                  |
| 16472 | 61   | 0 | 177  | 0 | 238  | 294.3   | 366.7  | No hits found                                                                                  |
| 16473 | 484  | 2 | 1069 | 0 | 1555 | 1167.5  | 2214.6 | No hits found                                                                                  |
| 16474 | 63   | 0 | 111  | 0 | 174  | 303.9   | 230.0  | gi 1168527 sp P14297.2 ARYB_MANSE arylphorin subunit $\beta$ precursor                         |
| 16501 | 293  | 0 | 252  | 0 | 545  | 1413.5  | 522.1  | gi 1168527 sp P14297.2 ARYB_MANSE arylphorin subunit $\beta$ precursor                         |
| 16510 | 23   | 0 | 108  | 0 | 131  | 111.0   | 223.7  | No hits found                                                                                  |
| 16519 | 354  | 1 | 833  | 0 | 1188 | 1707.8  | 1725.7 | No hits found                                                                                  |
| 16520 | 1    | 0 | 664  | 1 | 666  | 4.8     | 1375.6 | gi 4262357 gb AAD14591.1  scolexin A [Manduca sexta]                                           |
| 16537 | 2829 | 4 | 3897 | 0 | 6730 | 3411.9  | 8073.4 | gi 114240 sp P14296.1 ARYA_MANSE arylphorin subunit $\alpha$ precursor                         |
| 16606 | 8    | 0 | 164  | 0 | 172  | 38.6    | 339.8  | gi 136206 sp P22297.1 TRF_MANSE transferrin precursor                                          |
| 16664 | 2118 | 1 | 2768 | 0 | 4887 | 10217.7 | 5734.5 | gi 1168527 sp P14297.2 ARYB_MANSE arylphorin subunit $\beta$ precursor                         |
| 16715 | 43   | 0 | 73   | 0 | 116  | 207.4   | 151.2  | gi 1168527 sp P14297.2 ARYB_MANSE arylphorin subunit $\beta$ precursor                         |
| 16754 | 2    | 0 | 147  | 0 | 149  | 9.6     | 304.5  | No hits found                                                                                  |
| 16764 | 2956 | 6 | 4024 | 0 | 6986 | 2376.7  | 8336.5 | gi 1168527 sp P14297.2 ARYB_MANSE arylphorin subunit $\beta$ precursor                         |
| 16782 | 1    | 0 | 228  | 0 | 229  | 4.8     | 472.3  | No hits found                                                                                  |
| 16814 | 2401 | 2 | 3330 | 0 | 5733 | 5791.5  | 6898.8 | gi 114240 sp P14296.1 ARYA_MANSE arylphorin subunit $\alpha$ precursor                         |
| 16849 | 134  | 0 | 541  | 0 | 675  | 646.4   | 1120.8 | gi 114051738 ref NP_001040426.1  alcohol dehydrogenase [Bombyx mori]                           |
| 16977 | 19   | 0 | 101  | 0 | 120  | 91.7    | 209.2  | No hits found                                                                                  |
| 17123 | 176  | 2 | 461  | 0 | 639  | 424.5   | 955.1  | No hits found                                                                                  |
| 17193 | 27   | 0 | 233  | 0 | 260  | 130.3   | 482.7  | gi 136206 sp P22297.1 TRF_MANSE transferrin precursor                                          |
| 17199 | 42   | 2 | 33   | 4 | 81   | 101.3   | 17.1   | gi 3108073 gb AAC15763.1  putative multifunctional protein ADE2 [Manduca sexta]                |
| 17202 | 0    | 0 | 216  | 1 | 217  | 0.0     | 447.5  | No hits found                                                                                  |
| 17206 | 3    | 0 | 136  | 0 | 139  | 14.5    | 281.8  | gi 136206 sp P22297.1 TRF_MANSE transferrin precursor                                          |
| 17261 | 46   | 1 | 91   | 3 | 141  | 221.9   | 62.8   | No hits found                                                                                  |
| 17301 | 1    | 0 | 272  | 0 | 273  | 4.8     | 563.5  | gi 219958086 gb ACL68097.1  lebecin-related protein precursor [Manduca sexta]                  |
| 17312 | 92   | 0 | 136  | 0 | 228  | 443.8   | 281.8  | gi 134103857 gb ABO60878.1  cationic peptide CP8 precursor [Manduca sexta]                     |
| 17316 | 0    | 0 | 98   | 0 | 98   | 0.0     | 203.0  | No hits found                                                                                  |
| 17350 | 0    | 0 | 205  | 0 | 205  | 0.0     | 424.7  | gi 29469969 gb AAO74640.1  antimicrobial protein attacin 2 [Manduca sexta]                     |
| 17395 | 58   | 0 | 491  | 0 | 549  | 279.8   | 1017.2 | gi 136206 sp P22297.1 TRF_MANSE transferrin precursor                                          |
| 17434 | 1    | 0 | 314  | 0 | 315  | 4.8     | 650.5  | gi 219958086 gb ACL68097.1  lebecin-related protein precursor [Manduca sexta]                  |
| 17470 | 160  | 2 | 387  | 0 | 549  | 385.9   | 801.7  | No hits found                                                                                  |
| 17492 | 2020 | 2 | 2966 | 0 | 4988 | 4872.5  | 6144.7 | gi 114240 sp P14296.1 ARYA_MANSE arylphorin subunit $\alpha$ precursor                         |
| 17494 | 39   | 0 | 131  | 0 | 170  | 188.1   | 271.4  | gi 400673 sp P31420 OMB_MANSE ommochrome-binding protein precursor (OBP, YCP)                  |
| 17516 | 4    | 0 | 126  | 0 | 130  | 19.3    | 261.0  | gi 228382 prf 1803340A Met-rich storage protein SP1A                                           |
| 17611 | 29   | 1 | 19   | 0 | 49   | 139.9   | 39.4   | No hits found                                                                                  |
| 17770 | 114  | 0 | 391  | 0 | 505  | 550.0   | 810.0  | No hits found                                                                                  |
| 17813 | 95   | 0 | 118  | 0 | 213  | 458.3   | 244.5  | gi 400673 sp P31420 OMB_MANSE ommochrome-binding protein precursor (OBP, YCP)                  |
| 17814 | 21   | 0 | 74   | 1 | 96   | 101.3   | 153.3  | gi 112983872 ref NP_001036857.1  Serpin-like protein (SEP-LP) [Bombyx mori]                    |
| 17975 | 67   | 0 | 197  | 0 | 264  | 323.2   | 408.1  | No hits found                                                                                  |
| 18096 | 59   | 0 | 112  | 0 | 171  | 284.6   | 232.0  | No hits found                                                                                  |
| 18234 | 12   | 0 | 108  | 0 | 120  | 57.9    | 223.7  | gi 136206 sp P22297.1 TRF_MANSE transferrin precursor                                          |
| 18240 | 838  | 0 | 1269 | 0 | 2107 | 4042.7  | 2629.0 | gi 114240 sp P14296.1 ARYA_MANSE arylphorin subunit $\alpha$ precursor                         |
| 18257 | 939  | 0 | 1305 | 0 | 2244 | 4530.0  | 2703.6 | gi 114240 sp P14296.1 ARYA_MANSE arylphorin subunit $\alpha$ precursor                         |
| 18308 | 15   | 0 | 169  | 0 | 184  | 72.4    | 350.1  | gi 136206 sp P22297.1 TRF_MANSE transferrin precursor                                          |
| 18432 | 67   | 0 | 208  | 0 | 275  | 323.2   | 430.9  | No hits found                                                                                  |
| 18556 | 250  | 0 | 301  | 0 | 551  | 1206.1  | 623.6  | gi 114240 sp P14296.1 ARYA_MANSE arylphorin subunit $\alpha$ precursor                         |
| 18669 | 0    | 0 | 285  | 0 | 285  | 0.0     | 590.4  | gi 4262357 gb AAD14591.1  scolexin A [Manduca sexta]                                           |
| 18670 | 0    | 0 | 139  | 0 | 139  | 0.0     | 288.0  | gi 4262357 gb AAD14591.1  scolexin A [Manduca sexta]                                           |
| 18695 | 123  | 0 | 170  | 0 | 293  | 593.4   | 352.2  | gi 1168527 sp P14297.2 ARYB_MANSE arylphorin subunit $\beta$ precursor                         |
| 18768 | 125  | 0 | 294  | 0 | 419  | 603.0   | 609.1  | No hits found                                                                                  |
| 18797 | 9    | 0 | 549  | 0 | 558  | 43.4    | 1137.4 | gi 39843367 gb AAR32136.1  VHDL receptor [Helicoverpa zea]                                     |
| 18838 | 90   | 0 | 171  | 0 | 261  | 434.2   | 354.3  | No hits found                                                                                  |
| 18908 | 196  | 0 | 300  | 0 | 496  | 945.6   | 621.5  | No hits found                                                                                  |
| 18963 | 0    | 0 | 254  | 0 | 254  | 0.0     | 526.2  | gi 4262357 gb AAD14591.1  scolexin A [Manduca sexta]                                           |
| 18971 | 95   | 0 | 222  | 0 | 317  | 458.3   | 459.9  | No hits found                                                                                  |

\* RA and ARN are calculated using original read numbers as described in Section 2.3. Listed here are contigs with  $RA_{IF/TH} > 100$ ,  $RA_{CF/CH} > 100$ ,  $ARN_{IF} > 200$  when  $RN_{IH} = 0$ , or  $ARN_{CF} > 200$  when  $RN_{CH} = 0$ .  $RA_{IF/CF}$  and  $RA_{IH/CH}$  values are shown in red if they are greater than 100, whereas  $ARN_{CF}$  and  $ARN_{CH}$  values are shown in blue if they are higher than 200. In the columns of RA or ARN, cells shaded green and orange represent down- and up-regulated gene expression, respectively.
